# Supplementary material for: Can Isoflurane and Meloxicam Mitigate Pain Associated with Cautery Disbudding of 3-Week-Old Goat Kids?
Source: Animals (Basel). 2020 May 18;10(5):878. doi: 10.3390/ani10050878 (PMC7278394; doi:10.3390/ani10050878)
Supplement: Supplementary file 1 [file animals-10-00878-s001.xlsx]

## Sheet: Cortisol
Kid_ID!	Trt!	Pen!	Rep!	Trt_date!	Age_at_trt!	Farm!	Weight	Breed!	Baseline	Time!	Cortisol	Change
1	ISO	1	1-42212	2015-07-27	19	A	6	Saanen	17	15	36	19
2	MEL	1	1-42212	2015-07-27	18	A	5	Saanen	21	15	35	14
3	ISO+MEL	1	1-42212	2015-07-27	17	A	5.3	Saanen	80	15	42	-38
4	SHAM	1	1-42212	2015-07-27	17	A	5	Saanen	32	15	30	-2
5	CAUT	1	1-42212	2015-07-27	17	A	4.75	Saanen	30	15	86	56
6	CAUT	2	2-42212	2015-07-27	18	A	5.8	Saanen	20	15	27	7
7	SHAM	2	2-42212	2015-07-27	18	A	4.65	Toggenburg	13	15	142	129
9	ISO	2	2-42212	2015-07-27	16	A	5.6	Saanen	30	15	68	38
10	ISO+MEL	2	2-42212	2015-07-27	18	A	5.7	Toggenburg	66	15	54	-12
11	SHAM	3	3-42212	2015-07-27	16	A	6	Saanen	63	15	42	-21
12	ISO+MEL	3	3-42212	2015-07-27	18	A	4.5	Saanen	20	15	78	58
13	CAUT	3	3-42212	2015-07-27	18	A	6.25	Saanen	17	15	83	66
14	MEL	3	3-42212	2015-07-27	18	A	7	Saanen	7	15	72	65
15	ISO	3	3-42212	2015-07-27	16	A	4.75	Saanen	67	15	137	70
16	MEL	1	1-42216	2015-07-31	22	A	5.9	Alpine	4	15	74	70
17	CAUT	1	1-42216	2015-07-31	23	A	7.8	Alpine	35	15	217	182
18	ISO	1	1-42216	2015-07-31	21	A	5.9	Saanen	51	15	115	64
19	ISO+MEL	1	1-42216	2015-07-31	20	A	6.6	Saanen	17	15	31	14
20	SHAM	1	1-42216	2015-07-31	22	A	6.2	Saanen	22	15	31	9
21	ISO+MEL	2	2-42216	2015-07-31	20	A	5.7	Saanen	8	15	15	7
22	ISO	2	2-42216	2015-07-31	19	A	6.3	Saanen	13	15	122	109
23	SHAM	2	2-42216	2015-07-31	22	A	8.5	Saanen	6	15	30	24
24	CAUT	2	2-42216	2015-07-31	21	A	5.6	Saanen	89	15	160	71
25	MEL	2	2-42216	2015-07-31	19	A	5.8	Saanen	8	15	40	32
26	ISO+MEL	3	3-42216	2015-07-31	19	A	4.4	Saanen	3	15	39	36
27	ISO	3	3-42216	2015-07-31	22	A	5.5	Saanen	16	15	38	22
28	CAUT	3	3-42216	2015-07-31	20	A	5	Saanen	43	15	129	86
29	SHAM	3	3-42216	2015-07-31	21	A	6.6	Alpine	35	15	35	0
30	MEL	3	3-42216	2015-07-31	21	A	6.1	Saanen	49	15	69	20
31	SHAM	1	1-42219	2015-08-03	23	B	3.6	Saanen	4	15	24	20
32	ISO+MEL	1	1-42219	2015-08-03	23	A	5.9	Saanen	4	15	84	80
33	MEL	1	1-42219	2015-08-03	24	A	5.5	Saanen	37	15	85	48
34	CAUT	1	1-42219	2015-08-03	23	A	6.3	Saanen	27	15	71	44
35	ISO	1	1-42219	2015-08-03	25	A	5	Saanen	49	15	29	-20
36	ISO	2	2-42219	2015-08-03	24	A	6.1	Saanen	49	15	54	5
37	MEL	2	2-42219	2015-08-03	23	A	5.2	Saanen	6	15	67	61
38	SHAM	2	2-42219	2015-08-03	22	A	7	Saanen	24	15	48	24
39	ISO+MEL	2	2-42219	2015-08-03	25	A	7	Saanen	30	15	135	105
40	CAUT	2	2-42219	2015-08-03	22	A	5.6	Saanen	19	15	88	69
41	CAUT	3	3-42221	2015-08-05	17	B	5.8	Nubian	31	15	78	47
42	SHAM	3	3-42221	2015-08-05	16	A	5.8	Saanen	25	15	49	24
43	ISO	3	3-42221	2015-08-05	26	A	7.2	Saanen	18	15	53	35
44	MEL	3	3-42221	2015-08-05	25	A	5.5	Saanen	17	15	101	84
45	ISO+MEL	3	3-42221	2015-08-05	26	A	5.3	Saanen	16	15	89	73
46	MEL	4	4-42221	2015-08-05	25	A	7.2	Saanen	7	15	72	65
47	CAUT	4	4-42221	2015-08-05	25	A	8.2	Saanen	4	15	144	140
48	ISO+MEL	4	4-42221	2015-08-05	25	A	5.9	Saanen	22	15	33	11
49	ISO	4	4-42221	2015-08-05	25	A	6.4	Saanen	30	15	26	-4
50	SHAM	4	4-42221	2015-08-05	25	A	3.8	Saanen	16	15	34	18
1	ISO	1	1-42212	2015-07-27	19	A	6	Saanen	17	60	13	-4
2	MEL	1	1-42212	2015-07-27	18	A	5	Saanen	21	60	7	-14
3	ISO+MEL	1	1-42212	2015-07-27	17	A	5.3	Saanen	80	60	93	13
4	SHAM	1	1-42212	2015-07-27	17	A	5	Saanen	32	60	12	-20
5	CAUT	1	1-42212	2015-07-27	17	A	4.75	Saanen	30	60	56	26
6	CAUT	2	2-42212	2015-07-27	18	A	5.8	Saanen	20	60	9	-11
7	SHAM	2	2-42212	2015-07-27	18	A	4.65	Toggenburg	13	60	21	8
9	ISO	2	2-42212	2015-07-27	16	A	5.6	Saanen	30	60	81	51
10	ISO+MEL	2	2-42212	2015-07-27	18	A	5.7	Toggenburg	66	60	8	-58
11	SHAM	3	3-42212	2015-07-27	16	A	6	Saanen	63	60	9	-54
12	ISO+MEL	3	3-42212	2015-07-27	18	A	4.5	Saanen	20	60	152	132
13	CAUT	3	3-42212	2015-07-27	18	A	6.25	Saanen	17	60	9	-8
14	MEL	3	3-42212	2015-07-27	18	A	7	Saanen	7	60	9	2
15	ISO	3	3-42212	2015-07-27	16	A	4.75	Saanen	67	60	84	17
16	MEL	1	1-42216	2015-07-31	22	A	5.9	Alpine	4	60	9	5
17	CAUT	1	1-42216	2015-07-31	23	A	7.8	Alpine	35	60	44	9
18	ISO	1	1-42216	2015-07-31	21	A	5.9	Saanen	51	60	19	-32
19	ISO+MEL	1	1-42216	2015-07-31	20	A	6.6	Saanen	17	60	4	-13
20	SHAM	1	1-42216	2015-07-31	22	A	6.2	Saanen	22	60	5	-17
21	ISO+MEL	2	2-42216	2015-07-31	20	A	5.7	Saanen	8	60	3	-5
22	ISO	2	2-42216	2015-07-31	19	A	6.3	Saanen	13	60	14	1
23	SHAM	2	2-42216	2015-07-31	22	A	8.5	Saanen	6	60	4	-2
24	CAUT	2	2-42216	2015-07-31	21	A	5.6	Saanen	89	60	60	-29
25	MEL	2	2-42216	2015-07-31	19	A	5.8	Saanen	8	60	15	7
26	ISO+MEL	3	3-42216	2015-07-31	19	A	4.4	Saanen	3	60	6	3
27	ISO	3	3-42216	2015-07-31	22	A	5.5	Saanen	16	60	11	-5
28	CAUT	3	3-42216	2015-07-31	20	A	5	Saanen	43	60	14	-29
29	SHAM	3	3-42216	2015-07-31	21	A	6.6	Alpine	35	60	4	-31
30	MEL	3	3-42216	2015-07-31	21	A	6.1	Saanen	49	60	8	-41
31	SHAM	1	1-42219	2015-08-03	23	B	3.6	Saanen	4	60	10	6
32	ISO+MEL	1	1-42219	2015-08-03	23	A	5.9	Saanen	4	60	13	9
33	MEL	1	1-42219	2015-08-03	24	A	5.5	Saanen	37	60	13	-24
34	CAUT	1	1-42219	2015-08-03	23	A	6.3	Saanen	27	60	47	20
35	ISO	1	1-42219	2015-08-03	25	A	5	Saanen	49	60	9	-40
36	ISO	2	2-42219	2015-08-03	24	A	6.1	Saanen	49	60	10	-39
37	MEL	2	2-42219	2015-08-03	23	A	5.2	Saanen	6	60	14	8
38	SHAM	2	2-42219	2015-08-03	22	A	7	Saanen	24	60	24	0
39	ISO+MEL	2	2-42219	2015-08-03	25	A	7	Saanen	30	60	15	-15
40	CAUT	2	2-42219	2015-08-03	22	A	5.6	Saanen	19	60	15	-4
41	CAUT	3	3-42221	2015-08-05	17	B	5.8	Nubian	31	60	17	-14
42	SHAM	3	3-42221	2015-08-05	16	A	5.8	Saanen	25	60	8	-17
43	ISO	3	3-42221	2015-08-05	26	A	7.2	Saanen	18	60	8	-10
44	MEL	3	3-42221	2015-08-05	25	A	5.5	Saanen	17	60	11	-6
45	ISO+MEL	3	3-42221	2015-08-05	26	A	5.3	Saanen	16	60	8	-8
46	MEL	4	4-42221	2015-08-05	25	A	7.2	Saanen	7	60	7	0
47	CAUT	4	4-42221	2015-08-05	25	A	8.2	Saanen	4	60	17	13
48	ISO+MEL	4	4-42221	2015-08-05	25	A	5.9	Saanen	22	60	3	-19
49	ISO	4	4-42221	2015-08-05	25	A	6.4	Saanen	30	60	4	-26
50	SHAM	4	4-42221	2015-08-05	25	A	3.8	Saanen	16	60	17	1
1	ISO	1	1-42212	2015-07-27	19	A	6	Saanen	17	120	21	4
2	MEL	1	1-42212	2015-07-27	18	A	5	Saanen	21	120	23	2
3	ISO+MEL	1	1-42212	2015-07-27	17	A	5.3	Saanen	80	120	16	-64
4	SHAM	1	1-42212	2015-07-27	17	A	5	Saanen	32	120	6	-26
5	CAUT	1	1-42212	2015-07-27	17	A	4.75	Saanen	30	120	65	35
6	CAUT	2	2-42212	2015-07-27	18	A	5.8	Saanen	20	120	5	-15
7	SHAM	2	2-42212	2015-07-27	18	A	4.65	Toggenburg	13	120	99	86
9	ISO	2	2-42212	2015-07-27	16	A	5.6	Saanen	30	120	23	-7
10	ISO+MEL	2	2-42212	2015-07-27	18	A	5.7	Toggenburg	66	120	36	-30
11	SHAM	3	3-42212	2015-07-27	16	A	6	Saanen	63	120	19	-44
12	ISO+MEL	3	3-42212	2015-07-27	18	A	4.5	Saanen	20	120	38	18
13	CAUT	3	3-42212	2015-07-27	18	A	6.25	Saanen	17	120	50	33
14	MEL	3	3-42212	2015-07-27	18	A	7	Saanen	7	120	15	8
15	ISO	3	3-42212	2015-07-27	16	A	4.75	Saanen	67	120	86	19
16	MEL	1	1-42216	2015-07-31	22	A	5.9	Alpine	4	120	4	0
17	CAUT	1	1-42216	2015-07-31	23	A	7.8	Alpine	35	120	5	-30
18	ISO	1	1-42216	2015-07-31	21	A	5.9	Saanen	51	120	3	-48
19	ISO+MEL	1	1-42216	2015-07-31	20	A	6.6	Saanen	17	120	2	-15
20	SHAM	1	1-42216	2015-07-31	22	A	6.2	Saanen	22	120	2	-20
21	ISO+MEL	2	2-42216	2015-07-31	20	A	5.7	Saanen	8	120	3	-5
22	ISO	2	2-42216	2015-07-31	19	A	6.3	Saanen	13	120	5	-8
23	SHAM	2	2-42216	2015-07-31	22	A	8.5	Saanen	6	120	2	-4
24	CAUT	2	2-42216	2015-07-31	21	A	5.6	Saanen	89	120	51	-38
25	MEL	2	2-42216	2015-07-31	19	A	5.8	Saanen	8	120	40	32
26	ISO+MEL	3	3-42216	2015-07-31	19	A	4.4	Saanen	3	120	3	0
27	ISO	3	3-42216	2015-07-31	22	A	5.5	Saanen	16	120	10	-6
28	CAUT	3	3-42216	2015-07-31	20	A	5	Saanen	43	120	3	-40
29	SHAM	3	3-42216	2015-07-31	21	A	6.6	Alpine	35	120	6	-29
30	MEL	3	3-42216	2015-07-31	21	A	6.1	Saanen	49	120	4	-45
31	SHAM	1	1-42219	2015-08-03	23	B	3.6	Saanen	4	120	12	8
32	ISO+MEL	1	1-42219	2015-08-03	23	A	5.9	Saanen	4	120	6	2
33	MEL	1	1-42219	2015-08-03	24	A	5.5	Saanen	37	120	8	-29
34	CAUT	1	1-42219	2015-08-03	23	A	6.3	Saanen	27	120	47	20
35	ISO	1	1-42219	2015-08-03	25	A	5	Saanen	49	120	37	-12
36	ISO	2	2-42219	2015-08-03	24	A	6.1	Saanen	49	120	9	-40
37	MEL	2	2-42219	2015-08-03	23	A	5.2	Saanen	6	120	8	2
38	SHAM	2	2-42219	2015-08-03	22	A	7	Saanen	24	120	9	-15
39	ISO+MEL	2	2-42219	2015-08-03	25	A	7	Saanen	30	120	25	-5
40	CAUT	2	2-42219	2015-08-03	22	A	5.6	Saanen	19	120	16	-3
41	CAUT	3	3-42221	2015-08-05	17	B	5.8	Nubian	31	120	15	-16
42	SHAM	3	3-42221	2015-08-05	16	A	5.8	Saanen	25	120	5	-20
43	ISO	3	3-42221	2015-08-05	26	A	7.2	Saanen	18	120	11	-7
44	MEL	3	3-42221	2015-08-05	25	A	5.5	Saanen	17	120	6	-11
45	ISO+MEL	3	3-42221	2015-08-05	26	A	5.3	Saanen	16	120	3	-13
46	MEL	4	4-42221	2015-08-05	25	A	7.2	Saanen	7	120	3	-4
47	CAUT	4	4-42221	2015-08-05	25	A	8.2	Saanen	4	120	5	1
48	ISO+MEL	4	4-42221	2015-08-05	25	A	5.9	Saanen	22	120	2	-20
49	ISO	4	4-42221	2015-08-05	25	A	6.4	Saanen	30	120	24	-6
50	SHAM	4	4-42221	2015-08-05	25	A	3.8	Saanen	16	120	77	61

## Sheet: Lactate
Kid_ID!	Trt!	Pen!	Rep!	Trt_date!	Age_at_trt!	Farm!	Weight	Breed!	Baseline	Time!	Lactate	Change
1	ISO	1	1-42212	2015-07-27	19	A	6	Saanen	2.2	15	1.9	-0.3
2	MEL	1	1-42212	2015-07-27	18	A	5	Saanen	1.8	15	2.3	0.5
3	ISO+MEL	1	1-42212	2015-07-27	17	A	5.3	Saanen	1.6	15	1.5	-0.1
4	SHAM	1	1-42212	2015-07-27	17	A	5	Saanen	2.1	15	1.8	-0.3
5	CAUT	1	1-42212	2015-07-27	17	A	4.75	Saanen	2.2	15	1.6	-0.6
6	CAUT	2	2-42212	2015-07-27	18	A	5.8	Saanen	1.8	15	1.4	-0.4
7	SHAM	2	2-42212	2015-07-27	18	A	4.65	Toggenburg	6.4	15	4.3	-2.1
9	ISO	2	2-42212	2015-07-27	16	A	5.6	Saanen	2.1	15	3.3	1.2
10	ISO+MEL	2	2-42212	2015-07-27	18	A	5.7	Toggenburg	1.8	15	2	0.2
11	SHAM	3	3-42212	2015-07-27	16	A	6	Saanen	1.8	15	1.5	-0.3
12	ISO+MEL	3	3-42212	2015-07-27	18	A	4.5	Saanen	1.8	15	2.2	0.4
13	CAUT	3	3-42212	2015-07-27	18	A	6.25	Saanen	1.8	15	2.1	0.3
14	MEL	3	3-42212	2015-07-27	18	A	7	Saanen	1.2	15	3	1.8
15	ISO	3	3-42212	2015-07-27	16	A	4.75	Saanen	4	15	3.1	-0.9
16	MEL	1	1-42216	2015-07-31	22	A	5.9	Alpine	0.9	15	0.9	0
17	CAUT	1	1-42216	2015-07-31	23	A	7.8	Alpine	0.9	15	2.7	1.8
18	ISO	1	1-42216	2015-07-31	21	A	5.9	Saanen	1.5	15	1.2	-0.3
19	ISO+MEL	1	1-42216	2015-07-31	20	A	6.6	Saanen	1.5	15	1.5	0
20	SHAM	1	1-42216	2015-07-31	22	A	6.2	Saanen	2.4	15	0.7	-1.7
21	ISO+MEL	2	2-42216	2015-07-31	20	A	5.7	Saanen	1.6	15	0.9	-0.7
22	ISO	2	2-42216	2015-07-31	19	A	6.3	Saanen	1.1	15	0.8	-0.3
23	SHAM	2	2-42216	2015-07-31	22	A	8.5	Saanen	0.8	15	0.8	0
24	CAUT	2	2-42216	2015-07-31	21	A	5.6	Saanen	1.1	15	1.2	0.1
25	MEL	2	2-42216	2015-07-31	19	A	5.8	Saanen	1.3	15	2.5	1.2
26	ISO+MEL	3	3-42216	2015-07-31	19	A	4.4	Saanen	3.6	15	1.3	-2.3
27	ISO	3	3-42216	2015-07-31	22	A	5.5	Saanen	0.8	15	1.1	0.3
28	CAUT	3	3-42216	2015-07-31	20	A	5	Saanen	1.5	15	1.1	-0.4
29	SHAM	3	3-42216	2015-07-31	21	A	6.6	Alpine	1.4	15	1.1	-0.3
30	MEL	3	3-42216	2015-07-31	21	A	6.1	Saanen	0.9	15	1.1	0.2
31	SHAM	1	1-42219	2015-08-03	23	B	3.6	Saanen	1.3	15	1.9	0.6
32	ISO+MEL	1	1-42219	2015-08-03	23	A	5.9	Saanen	2.3	15	2.6	0.3
33	MEL	1	1-42219	2015-08-03	24	A	5.5	Saanen	2.6	15	1.8	-0.8
34	CAUT	1	1-42219	2015-08-03	23	A	6.3	Saanen	1.3	15	1.1	-0.2
35	ISO	1	1-42219	2015-08-03	25	A	5	Saanen	1.2	15	1.3	0.1
36	ISO	2	2-42219	2015-08-03	24	A	6.1	Saanen	1.7	15	1.4	-0.3
37	MEL	2	2-42219	2015-08-03	23	A	5.2	Saanen	1.9	15	2.4	0.5
38	SHAM	2	2-42219	2015-08-03	22	A	7	Saanen	2.6	15	2.4	-0.2
39	ISO+MEL	2	2-42219	2015-08-03	25	A	7	Saanen	1.4	15	1.2	-0.2
40	CAUT	2	2-42219	2015-08-03	22	Kerrys	5.6	Saanen	0.9	15	1.1	0.2
41	CAUT	3	3-42221	2015-08-05	17	B	5.8	Nubian	1.5	15	1.8	0.3
42	SHAM	3	3-42221	2015-08-05	16	Kerrys	5.8	Saanen	1.2	15	0.9	-0.3
43	ISO	3	3-42221	2015-08-05	26	Kerrys	7.2	Saanen	2.4	15	1.5	-0.9
44	MEL	3	3-42221	2015-08-05	25	Kerrys	5.5	Saanen	2.6	15	2.4	-0.2
45	ISO+MEL	3	3-42221	2015-08-05	26	Kerrys	5.3	Saanen	2.6	15	1.3	-1.3
46	MEL	4	4-42221	2015-08-05	25	Kerrys	7.2	Saanen	2.1	15	2	-0.1
47	CAUT	4	4-42221	2015-08-05	25	Kerrys	8.2	Saanen	1.9	15	2.6	0.7
48	ISO+MEL	4	4-42221	2015-08-05	25	Kerrys	5.9	Saanen	2.6	15	1.5	-1.1
49	ISO	4	4-42221	2015-08-05	25	Kerrys	6.4	Saanen	3.1	15	0.9	-2.2
50	SHAM	4	4-42221	2015-08-05	25	Kerrys	3.8	Saanen	3	15	5.7	2.7
1	ISO	1	1-42212	2015-07-27	19	A	6	Saanen	2.2	60	2.8	0.6
2	MEL	1	1-42212	2015-07-27	18	A	5	Saanen	1.8	60	1.6	-0.2
3	ISO+MEL	1	1-42212	2015-07-27	17	A	5.3	Saanen	1.6	60	1.7	0.1
4	SHAM	1	1-42212	2015-07-27	17	A	5	Saanen	2.1	60	2.3	0.2
5	CAUT	1	1-42212	2015-07-27	17	A	4.75	Saanen	2.2	60	1.7	-0.5
6	CAUT	2	2-42212	2015-07-27	18	A	5.8	Saanen	1.8	60	2.7	0.9
7	SHAM	2	2-42212	2015-07-27	18	A	4.65	Toggenburg	6.4	60	3.6	-2.8
9	ISO	2	2-42212	2015-07-27	16	A	5.6	Saanen	2.1	60	3.2	1.1
10	ISO+MEL	2	2-42212	2015-07-27	18	A	5.7	Toggenburg	1.8	60	1.3	-0.5
11	SHAM	3	3-42212	2015-07-27	16	A	6	Saanen	1.8	60	1.2	-0.6
12	ISO+MEL	3	3-42212	2015-07-27	18	A	4.5	Saanen	1.8	60	1.7	-0.1
13	CAUT	3	3-42212	2015-07-27	18	A	6.25	Saanen	1.8	60	1.2	-0.6
14	MEL	3	3-42212	2015-07-27	18	A	7	Saanen	1.2	60	1.2	0
15	ISO	3	3-42212	2015-07-27	16	A	4.75	Saanen	4	60	1.3	-2.7
16	MEL	1	1-42216	2015-07-31	22	A	5.9	Alpine	0.9	60	0.9	0
17	CAUT	1	1-42216	2015-07-31	23	A	7.8	Alpine	0.9	60	0.9	0
18	ISO	1	1-42216	2015-07-31	21	A	5.9	Saanen	1.5	60	2.1	0.6
19	ISO+MEL	1	1-42216	2015-07-31	20	A	6.6	Saanen	1.5	60	1	-0.5
20	SHAM	1	1-42216	2015-07-31	22	A	6.2	Saanen	2.4	60	0.8	-1.6
21	ISO+MEL	2	2-42216	2015-07-31	20	A	5.7	Saanen	1.6	60	0.8	-0.8
22	ISO	2	2-42216	2015-07-31	19	A	6.3	Saanen	1.1	60	0.9	-0.2
23	SHAM	2	2-42216	2015-07-31	22	A	8.5	Saanen	0.8	60	0.8	0
24	CAUT	2	2-42216	2015-07-31	21	A	5.6	Saanen	1.1	60	0.9	-0.2
25	MEL	2	2-42216	2015-07-31	19	A	5.8	Saanen	1.3	60	1	-0.3
26	ISO+MEL	3	3-42216	2015-07-31	19	A	4.4	Saanen	3.6	60	2.8	-0.8
27	ISO	3	3-42216	2015-07-31	22	A	5.5	Saanen	0.8	60	1	0.2
28	CAUT	3	3-42216	2015-07-31	20	A	5	Saanen	1.5	60	0.8	-0.7
29	SHAM	3	3-42216	2015-07-31	21	A	6.6	Alpine	1.4	60	0.7	-0.7
30	MEL	3	3-42216	2015-07-31	21	A	6.1	Saanen	0.9	60	1	0.1
31	SHAM	1	1-42219	2015-08-03	23	B	3.6	Saanen	1.3	60	1.6	0.3
32	ISO+MEL	1	1-42219	2015-08-03	23	A	5.9	Saanen	2.3	60	2.9	0.6
33	MEL	1	1-42219	2015-08-03	24	A	5.5	Saanen	2.6	60	2.6	0
34	CAUT	1	1-42219	2015-08-03	23	A	6.3	Saanen	1.3	60	0.8	-0.5
35	ISO	1	1-42219	2015-08-03	25	A	5	Saanen	1.2	60	1.6	0.4
36	ISO	2	2-42219	2015-08-03	24	A	6.1	Saanen	1.7	60	2.4	0.7
37	MEL	2	2-42219	2015-08-03	23	A	5.2	Saanen	1.9	60	2.2	0.3
38	SHAM	2	2-42219	2015-08-03	22	A	7	Saanen	2.6	60	1.9	-0.7
39	ISO+MEL	2	2-42219	2015-08-03	25	A	7	Saanen	1.4	60	2	0.6
40	CAUT	2	2-42219	2015-08-03	22	Kerrys	5.6	Saanen	0.9	60	1.5	0.6
41	CAUT	3	3-42221	2015-08-05	17	B	5.8	Nubian	1.5	60	1.8	0.3
42	SHAM	3	3-42221	2015-08-05	16	Kerrys	5.8	Saanen	1.2	60	0.9	-0.3
43	ISO	3	3-42221	2015-08-05	26	Kerrys	7.2	Saanen	2.4	60	2.1	-0.3
44	MEL	3	3-42221	2015-08-05	25	Kerrys	5.5	Saanen	2.6	60	2.7	0.1
45	ISO+MEL	3	3-42221	2015-08-05	26	Kerrys	5.3	Saanen	2.6	60	1.1	-1.5
46	MEL	4	4-42221	2015-08-05	25	Kerrys	7.2	Saanen	2.1	60	2.5	0.4
47	CAUT	4	4-42221	2015-08-05	25	Kerrys	8.2	Saanen	1.9	60	2.5	0.6
48	ISO+MEL	4	4-42221	2015-08-05	25	Kerrys	5.9	Saanen	2.6	60	1.7	-0.9
49	ISO	4	4-42221	2015-08-05	25	Kerrys	6.4	Saanen	3.1	60	1.7	-1.4
50	SHAM	4	4-42221	2015-08-05	25	Kerrys	3.8	Saanen	3	60	2.5	-0.5
1	ISO	1	1-42212	2015-07-27	19	A	6	Saanen	2.2	120	1.4	-0.8
2	MEL	1	1-42212	2015-07-27	18	A	5	Saanen	1.8	120	3.1	1.3
3	ISO+MEL	1	1-42212	2015-07-27	17	A	5.3	Saanen	1.6	120	1.6	0
4	SHAM	1	1-42212	2015-07-27	17	A	5	Saanen	2.1	120	1.2	-0.9
5	CAUT	1	1-42212	2015-07-27	17	A	4.75	Saanen	2.2	120	1.1	-1.1
6	CAUT	2	2-42212	2015-07-27	18	A	5.8	Saanen	1.8	120	1.1	-0.7
7	SHAM	2	2-42212	2015-07-27	18	A	4.65	Toggenburg	6.4	120	5.6	-0.8
9	ISO	2	2-42212	2015-07-27	16	A	5.6	Saanen	2.1	120	2	-0.1
10	ISO+MEL	2	2-42212	2015-07-27	18	A	5.7	Toggenburg	1.8	120	2	0.2
11	SHAM	3	3-42212	2015-07-27	16	A	6	Saanen	1.8	120	1.4	-0.4
12	ISO+MEL	3	3-42212	2015-07-27	18	A	4.5	Saanen	1.8	120	1.9	0.1
13	CAUT	3	3-42212	2015-07-27	18	A	6.25	Saanen	1.8	120	2.2	0.4
14	MEL	3	3-42212	2015-07-27	18	A	7	Saanen	1.2	120	2.1	0.9
15	ISO	3	3-42212	2015-07-27	16	A	4.75	Saanen	4	120	1.6	-2.4
16	MEL	1	1-42216	2015-07-31	22	A	5.9	Alpine	0.9	120	1	0.1
17	CAUT	1	1-42216	2015-07-31	23	A	7.8	Alpine	0.9	120	0.9	0
18	ISO	1	1-42216	2015-07-31	21	A	5.9	Saanen	1.5	120	1.1	-0.4
19	ISO+MEL	1	1-42216	2015-07-31	20	A	6.6	Saanen	1.5	120	1.2	-0.3
20	SHAM	1	1-42216	2015-07-31	22	A	6.2	Saanen	2.4	120	0.9	-1.5
21	ISO+MEL	2	2-42216	2015-07-31	20	A	5.7	Saanen	1.6	120	0.9	-0.7
22	ISO	2	2-42216	2015-07-31	19	A	6.3	Saanen	1.1	120	1.4	0.3
23	SHAM	2	2-42216	2015-07-31	22	A	8.5	Saanen	0.8	120	1	0.2
24	CAUT	2	2-42216	2015-07-31	21	A	5.6	Saanen	1.1	120	1.5	0.4
25	MEL	2	2-42216	2015-07-31	19	A	5.8	Saanen	1.3	120	1.9	0.6
26	ISO+MEL	3	3-42216	2015-07-31	19	A	4.4	Saanen	3.6	120	2.1	-1.5
27	ISO	3	3-42216	2015-07-31	22	A	5.5	Saanen	0.8	120	1.3	0.5
28	CAUT	3	3-42216	2015-07-31	20	A	5	Saanen	1.5	120	1.1	-0.4
29	SHAM	3	3-42216	2015-07-31	21	A	6.6	Alpine	1.4	120	1.3	-0.1
30	MEL	3	3-42216	2015-07-31	21	A	6.1	Saanen	0.9	120	1.3	0.4
31	SHAM	1	1-42219	2015-08-03	23	B	3.6	Saanen	1.3	120	2.1	0.8
32	ISO+MEL	1	1-42219	2015-08-03	23	A	5.9	Saanen	2.3	120	2.7	0.4
33	MEL	1	1-42219	2015-08-03	24	A	5.5	Saanen	2.6	120	2.9	0.3
34	CAUT	1	1-42219	2015-08-03	23	A	6.3	Saanen	1.3	120	1	-0.3
35	ISO	1	1-42219	2015-08-03	25	A	5	Saanen	1.2	120	1.3	0.1
36	ISO	2	2-42219	2015-08-03	24	A	6.1	Saanen	1.7	120	2.2	0.5
37	MEL	2	2-42219	2015-08-03	23	A	5.2	Saanen	1.9	120	1.6	-0.3
38	SHAM	2	2-42219	2015-08-03	22	A	7	Saanen	2.6	120	1.2	-1.4
39	ISO+MEL	2	2-42219	2015-08-03	25	A	7	Saanen	1.4	120	0.7	-0.7
40	CAUT	2	2-42219	2015-08-03	22	Kerrys	5.6	Saanen	0.9	120	1	0.1
41	CAUT	3	3-42221	2015-08-05	17	B	5.8	Nubian	1.5	120	2.9	1.4
42	SHAM	3	3-42221	2015-08-05	16	Kerrys	5.8	Saanen	1.2	120	1.3	0.1
43	ISO	3	3-42221	2015-08-05	26	Kerrys	7.2	Saanen	2.4	120	2.1	-0.3
44	MEL	3	3-42221	2015-08-05	25	Kerrys	5.5	Saanen	2.6	120	1.9	-0.7
45	ISO+MEL	3	3-42221	2015-08-05	26	Kerrys	5.3	Saanen	2.6	120	1.2	-1.4
46	MEL	4	4-42221	2015-08-05	25	Kerrys	7.2	Saanen	2.1	120	1.3	-0.8
47	CAUT	4	4-42221	2015-08-05	25	Kerrys	8.2	Saanen	1.9	120	1.3	-0.6
48	ISO+MEL	4	4-42221	2015-08-05	25	Kerrys	5.9	Saanen	2.6	120	3	0.4
49	ISO	4	4-42221	2015-08-05	25	Kerrys	6.4	Saanen	3.1	120	1.7	-1.4
50	SHAM	4	4-42221	2015-08-05	25	Kerrys	3.8	Saanen	3	120	1.9	-1.1

## Sheet: Glucose
Kid_ID!	Trt!	Pen!	Rep!	Trt_date!	Age_at_trt!	Farm!	Weight	Breed!	Baseline	Time!	Glucose	Change
1	ISO	1	1-42212	2015-07-27	19	A	6	Saanen	6.2	15	6.8	0.6
2	MEL	1	1-42212	2015-07-27	18	A	5	Saanen	5.4	15	5.2	-0.2
3	ISO+MEL	1	1-42212	2015-07-27	17	A	5.3	Saanen	6.2	15	5.2	-1
4	SHAM	1	1-42212	2015-07-27	17	A	5	Saanen	7.2	15	6.4	-0.8
5	CAUT	1	1-42212	2015-07-27	17	A	4.75	Saanen	6.5	15	5.3	-1.2
6	CAUT	2	2-42212	2015-07-27	18	A	5.8	Saanen	7.2	15	7.7	0.5
7	SHAM	2	2-42212	2015-07-27	18	A	4.65	Toggenburg	5.2	15	6.7	1.5
9	ISO	2	2-42212	2015-07-27	16	A	5.6	Saanen	6.4	15	6.5	0.1
10	ISO+MEL	2	2-42212	2015-07-27	18	A	5.7	Toggenburg	6.2	15	4.8	-1.4
11	SHAM	3	3-42212	2015-07-27	16	A	6	Saanen	5.2	15	5.6	0.4
12	ISO+MEL	3	3-42212	2015-07-27	18	A	4.5	Saanen	5.8	15	6.3	0.5
13	CAUT	3	3-42212	2015-07-27	18	A	6.25	Saanen	5.6	15	5.4	-0.2
14	MEL	3	3-42212	2015-07-27	18	A	7	Saanen	5.9	15	5.7	-0.2
15	ISO	3	3-42212	2015-07-27	16	A	4.75	Saanen	6.4	15	6	-0.4
16	MEL	1	1-42216	2015-07-31	22	A	5.9	Alpine	6	15	6.6	0.6
17	CAUT	1	1-42216	2015-07-31	23	A	7.8	Alpine	6.5	15	6.6	0.1
18	ISO	1	1-42216	2015-07-31	21	A	5.9	Saanen	4.4	15	5.9	1.5
19	ISO+MEL	1	1-42216	2015-07-31	20	A	6.6	Saanen	5.9	15	5.4	-0.5
20	SHAM	1	1-42216	2015-07-31	22	A	6.2	Saanen	2.9	15	6	3.1
21	ISO+MEL	2	2-42216	2015-07-31	20	A	5.7	Saanen	5.7	15	4.4	-1.3
22	ISO	2	2-42216	2015-07-31	19	A	6.3	Saanen	5.5	15	4.9	-0.6
23	SHAM	2	2-42216	2015-07-31	22	A	8.5	Saanen	6.7	15	4.5	-2.2
24	CAUT	2	2-42216	2015-07-31	21	A	5.6	Saanen	5.7	15	5.4	-0.3
25	MEL	2	2-42216	2015-07-31	19	A	5.8	Saanen	5.9	15	7.2	1.3
26	ISO+MEL	3	3-42216	2015-07-31	19	A	4.4	Saanen	6.6	15	6.3	-0.3
27	ISO	3	3-42216	2015-07-31	22	A	5.5	Saanen	5.7	15	5.5	-0.2
28	CAUT	3	3-42216	2015-07-31	20	A	5	Saanen	7.1	15	6.4	-0.7
29	SHAM	3	3-42216	2015-07-31	21	A	6.6	Alpine	6.1	15	5.7	-0.4
30	MEL	3	3-42216	2015-07-31	21	A	6.1	Saanen	5.7	15	6.4	0.7
31	SHAM	1	1-42219	2015-08-03	23	B	3.6	Saanen	5.2	15	4.6	-0.6
32	ISO+MEL	1	1-42219	2015-08-03	23	A	5.9	Saanen	7.6	15	5.5	-2.1
33	MEL	1	1-42219	2015-08-03	24	A	5.5	Saanen	6.6	15	6.4	-0.2
34	CAUT	1	1-42219	2015-08-03	23	A	6.3	Saanen	6	15	6.3	0.3
35	ISO	1	1-42219	2015-08-03	25	A	5	Saanen	5	15	5	0
36	ISO	2	2-42219	2015-08-03	24	A	6.1	Saanen	6.7	15	6.6	-0.1
37	MEL	2	2-42219	2015-08-03	23	A	5.2	Saanen	5.7	15	5.8	0.1
38	SHAM	2	2-42219	2015-08-03	22	A	7	Saanen	5.6	15	6.8	1.2
39	ISO+MEL	2	2-42219	2015-08-03	25	A	7	Saanen	5.8	15	4.3	-1.5
40	CAUT	2	2-42219	2015-08-03	22	A	5.6	Saanen	6.4	15	5.6	-0.8
41	CAUT	3	3-42221	2015-08-05	17	B	5.8	Nubian	5.2	15	6.8	1.6
42	SHAM	3	3-42221	2015-08-05	16	A	5.8	Saanen	4.2	15	7	2.8
43	ISO	3	3-42221	2015-08-05	26	A	7.2	Saanen	5.3	15	5.4	0.1
44	MEL	3	3-42221	2015-08-05	25	A	5.5	Saanen	5.9	15	5.7	-0.2
45	ISO+MEL	3	3-42221	2015-08-05	26	A	5.3	Saanen	6.8	15	5.8	-1
46	MEL	4	4-42221	2015-08-05	25	A	7.2	Saanen	5.5	15	7.9	2.4
47	CAUT	4	4-42221	2015-08-05	25	A	8.2	Saanen	6.5	15	7	0.5
48	ISO+MEL	4	4-42221	2015-08-05	25	A	5.9	Saanen	5.4	15	5.8	0.4
49	ISO	4	4-42221	2015-08-05	25	A	6.4	Saanen	6.4	15	5.8	-0.6
50	SHAM	4	4-42221	2015-08-05	25	A	3.8	Saanen	4.6	15	5.2	0.6
1	ISO	1	1-42212	2015-07-27	19	A	6	Saanen	6.2	60	6.6	0.4
2	MEL	1	1-42212	2015-07-27	18	A	5	Saanen	5.4	60	5.4	0
3	ISO+MEL	1	1-42212	2015-07-27	17	A	5.3	Saanen	6.2	60	5.4	-0.8
4	SHAM	1	1-42212	2015-07-27	17	A	5	Saanen	7.2	60	4	-3.2
5	CAUT	1	1-42212	2015-07-27	17	A	4.75	Saanen	6.5	60	6.2	-0.3
6	CAUT	2	2-42212	2015-07-27	18	A	5.8	Saanen	7.2	60	6.8	-0.4
7	SHAM	2	2-42212	2015-07-27	18	A	4.65	Toggenburg	5.2	60	5.5	0.3
9	ISO	2	2-42212	2015-07-27	16	A	5.6	Saanen	6.4	60	6.1	-0.3
10	ISO+MEL	2	2-42212	2015-07-27	18	A	5.7	Toggenburg	6.2	60	5.6	-0.6
11	SHAM	3	3-42212	2015-07-27	16	A	6	Saanen	5.2	60	5	-0.2
12	ISO+MEL	3	3-42212	2015-07-27	18	A	4.5	Saanen	5.8	60	5.6	-0.2
13	CAUT	3	3-42212	2015-07-27	18	A	6.25	Saanen	5.6	60	5.4	-0.2
14	MEL	3	3-42212	2015-07-27	18	A	7	Saanen	5.9	60	5.2	-0.7
15	ISO	3	3-42212	2015-07-27	16	A	4.75	Saanen	6.4	60	5.8	-0.6
16	MEL	1	1-42216	2015-07-31	22	A	5.9	Alpine	6	60	5.7	-0.3
17	CAUT	1	1-42216	2015-07-31	23	A	7.8	Alpine	6.5	60	7.6	1.1
18	ISO	1	1-42216	2015-07-31	21	A	5.9	Saanen	4.4	60	6.1	1.7
19	ISO+MEL	1	1-42216	2015-07-31	20	A	6.6	Saanen	5.9	60	3.8	-2.1
20	SHAM	1	1-42216	2015-07-31	22	A	6.2	Saanen	2.9	60	6.1	3.2
21	ISO+MEL	2	2-42216	2015-07-31	20	A	5.7	Saanen	5.7	60	4.7	-1
22	ISO	2	2-42216	2015-07-31	19	A	6.3	Saanen	5.5	60	5.5	0
23	SHAM	2	2-42216	2015-07-31	22	A	8.5	Saanen	6.7	60	6.1	-0.6
24	CAUT	2	2-42216	2015-07-31	21	A	5.6	Saanen	5.7	60	5.9	0.2
25	MEL	2	2-42216	2015-07-31	19	A	5.8	Saanen	5.9	60	5.8	-0.1
26	ISO+MEL	3	3-42216	2015-07-31	19	A	4.4	Saanen	6.6	60	6	-0.6
27	ISO	3	3-42216	2015-07-31	22	A	5.5	Saanen	5.7	60	5.9	0.2
28	CAUT	3	3-42216	2015-07-31	20	A	5	Saanen	7.1	60	6.8	-0.3
29	SHAM	3	3-42216	2015-07-31	21	A	6.6	Alpine	6.1	60	6	-0.1
30	MEL	3	3-42216	2015-07-31	21	A	6.1	Saanen	5.7	60	5.8	0.1
31	SHAM	1	1-42219	2015-08-03	23	B	3.6	Saanen	5.2	60	4.7	-0.5
32	ISO+MEL	1	1-42219	2015-08-03	23	A	5.9	Saanen	7.6	60	7.2	-0.4
33	MEL	1	1-42219	2015-08-03	24	A	5.5	Saanen	6.6	60	7.5	0.9
34	CAUT	1	1-42219	2015-08-03	23	A	6.3	Saanen	6	60	5.7	-0.3
35	ISO	1	1-42219	2015-08-03	25	A	5	Saanen	5	60	4.8	-0.2
36	ISO	2	2-42219	2015-08-03	24	A	6.1	Saanen	6.7	60	5.9	-0.8
37	MEL	2	2-42219	2015-08-03	23	A	5.2	Saanen	5.7	60	6.3	0.6
38	SHAM	2	2-42219	2015-08-03	22	A	7	Saanen	5.6	60	6.5	0.9
39	ISO+MEL	2	2-42219	2015-08-03	25	A	7	Saanen	5.8	60	5.2	-0.6
40	CAUT	2	2-42219	2015-08-03	22	A	5.6	Saanen	6.4	60	5.5	-0.9
41	CAUT	3	3-42221	2015-08-05	17	B	5.8	Nubian	5.2	60	4.9	-0.3
42	SHAM	3	3-42221	2015-08-05	16	A	5.8	Saanen	4.2	60	6.9	2.7
43	ISO	3	3-42221	2015-08-05	26	A	7.2	Saanen	5.3	60	6	0.7
44	MEL	3	3-42221	2015-08-05	25	A	5.5	Saanen	5.9	60	5.6	-0.3
45	ISO+MEL	3	3-42221	2015-08-05	26	A	5.3	Saanen	6.8	60	7.3	0.5
46	MEL	4	4-42221	2015-08-05	25	A	7.2	Saanen	5.5	60	7.4	1.9
47	CAUT	4	4-42221	2015-08-05	25	A	8.2	Saanen	6.5	60	7.4	0.9
48	ISO+MEL	4	4-42221	2015-08-05	25	A	5.9	Saanen	5.4	60	4.1	-1.3
49	ISO	4	4-42221	2015-08-05	25	A	6.4	Saanen	6.4	60	6.8	0.4
50	SHAM	4	4-42221	2015-08-05	25	A	3.8	Saanen	4.6	60	5	0.4
1	ISO	1	1-42212	2015-07-27	19	A	6	Saanen	6.2	120	7	0.8
2	MEL	1	1-42212	2015-07-27	18	A	5	Saanen	5.4	120	5.6	0.2
3	ISO+MEL	1	1-42212	2015-07-27	17	A	5.3	Saanen	6.2	120	6.3	0.1
4	SHAM	1	1-42212	2015-07-27	17	A	5	Saanen	7.2	120	5.7	-1.5
5	CAUT	1	1-42212	2015-07-27	17	A	4.75	Saanen	6.5	120	6	-0.5
6	CAUT	2	2-42212	2015-07-27	18	A	5.8	Saanen	7.2	120	7.5	0.3
7	SHAM	2	2-42212	2015-07-27	18	A	4.65	Toggenburg	5.2	120	6	0.8
9	ISO	2	2-42212	2015-07-27	16	A	5.6	Saanen	6.4	120	6.6	0.2
10	ISO+MEL	2	2-42212	2015-07-27	18	A	5.7	Toggenburg	6.2	120	6.2	0
11	SHAM	3	3-42212	2015-07-27	16	A	6	Saanen	5.2	120	7.7	2.5
12	ISO+MEL	3	3-42212	2015-07-27	18	A	4.5	Saanen	5.8	120	7.1	1.3
13	CAUT	3	3-42212	2015-07-27	18	A	6.25	Saanen	5.6	120	6.3	0.7
14	MEL	3	3-42212	2015-07-27	18	A	7	Saanen	5.9	120	6.5	0.6
15	ISO	3	3-42212	2015-07-27	16	A	4.75	Saanen	6.4	120	6.7	0.3
16	MEL	1	1-42216	2015-07-31	22	A	5.9	Alpine	6	120	6.2	0.2
17	CAUT	1	1-42216	2015-07-31	23	A	7.8	Alpine	6.5	120	6.2	-0.3
18	ISO	1	1-42216	2015-07-31	21	A	5.9	Saanen	4.4	120	7.1	2.7
19	ISO+MEL	1	1-42216	2015-07-31	20	A	6.6	Saanen	5.9	120	5.8	-0.1
20	SHAM	1	1-42216	2015-07-31	22	A	6.2	Saanen	2.9	120	5.8	2.9
21	ISO+MEL	2	2-42216	2015-07-31	20	A	5.7	Saanen	5.7	120	5.5	-0.2
22	ISO	2	2-42216	2015-07-31	19	A	6.3	Saanen	5.5	120	5.6	0.1
23	SHAM	2	2-42216	2015-07-31	22	A	8.5	Saanen	6.7	120	5.9	-0.8
24	CAUT	2	2-42216	2015-07-31	21	A	5.6	Saanen	5.7	120	5.7	0
25	MEL	2	2-42216	2015-07-31	19	A	5.8	Saanen	5.9	120	6.4	0.5
26	ISO+MEL	3	3-42216	2015-07-31	19	A	4.4	Saanen	6.6	120	6.5	-0.1
27	ISO	3	3-42216	2015-07-31	22	A	5.5	Saanen	5.7	120	6.1	0.4
28	CAUT	3	3-42216	2015-07-31	20	A	5	Saanen	7.1	120	7.3	0.2
29	SHAM	3	3-42216	2015-07-31	21	A	6.6	Alpine	6.1	120	6.4	0.3
30	MEL	3	3-42216	2015-07-31	21	A	6.1	Saanen	5.7	120	7.2	1.5
31	SHAM	1	1-42219	2015-08-03	23	B	3.6	Saanen	5.2	120	5.3	0.1
32	ISO+MEL	1	1-42219	2015-08-03	23	A	5.9	Saanen	7.6	120	6.7	-0.9
33	MEL	1	1-42219	2015-08-03	24	A	5.5	Saanen	6.6	120	6.6	0
34	CAUT	1	1-42219	2015-08-03	23	A	6.3	Saanen	6	120	6.2	0.2
35	ISO	1	1-42219	2015-08-03	25	A	5	Saanen	5	120	6	1
36	ISO	2	2-42219	2015-08-03	24	A	6.1	Saanen	6.7	120	6.6	-0.1
37	MEL	2	2-42219	2015-08-03	23	A	5.2	Saanen	5.7	120	5.4	-0.3
38	SHAM	2	2-42219	2015-08-03	22	A	7	Saanen	5.6	120	7.8	2.2
39	ISO+MEL	2	2-42219	2015-08-03	25	A	7	Saanen	5.8	120	5.5	-0.3
40	CAUT	2	2-42219	2015-08-03	22	A	5.6	Saanen	6.4	120	5.6	-0.8
41	CAUT	3	3-42221	2015-08-05	17	B	5.8	Nubian	5.2	120	6.5	1.3
42	SHAM	3	3-42221	2015-08-05	16	A	5.8	Saanen	4.2	120	5	0.8
43	ISO	3	3-42221	2015-08-05	26	A	7.2	Saanen	5.3	120	5.7	0.4
44	MEL	3	3-42221	2015-08-05	25	A	5.5	Saanen	5.9	120	6	0.1
45	ISO+MEL	3	3-42221	2015-08-05	26	A	5.3	Saanen	6.8	120	6.7	-0.1
46	MEL	4	4-42221	2015-08-05	25	A	7.2	Saanen	5.5	120	7.1	1.6
47	CAUT	4	4-42221	2015-08-05	25	A	8.2	Saanen	6.5	120	7.1	0.6
48	ISO+MEL	4	4-42221	2015-08-05	25	A	5.9	Saanen	5.4	120	5.2	-0.2
49	ISO	4	4-42221	2015-08-05	25	A	6.4	Saanen	6.4	120	5.1	-1.3
50	SHAM	4	4-42221	2015-08-05	25	A	3.8	Saanen	4.6	120	5.2	0.6

## Sheet: Rectal Temperature
Kid_ID!	Trt!	Pen!	Rep!	Trt_date!	Age_at_trt!	Farm!	Weight	Breed!	Baseline	Time!	Rectal temperature	Change
1	ISO	1	1-42212	2015-07-27	19	A	6	Saanen	39.8	15	39.4	-0.4
2	MEL	1	1-42212	2015-07-27	18	A	5	Saanen	39.4	15	39.3	-0.1
3	ISO+MEL	1	1-42212	2015-07-27	17	A	5.3	Saanen	39.6	15	39.5	-0.1
4	SHAM	1	1-42212	2015-07-27	17	A	5	Saanen	40	15	39.8	-0.2
5	CAUT	1	1-42212	2015-07-27	17	A	4.75	Saanen	39.8	15	39.7	-0.1
6	CAUT	2	2-42212	2015-07-27	18	A	5.8	Saanen	39.7	15	39.6	-0.1
7	SHAM	2	2-42212	2015-07-27	18	A	4.65	Toggenburg	39.4	15	39.5	0.1
9	ISO	2	2-42212	2015-07-27	16	A	5.6	Saanen	39.8	15	39.2	-0.6
10	ISO+MEL	2	2-42212	2015-07-27	18	A	5.7	Toggenburg	40.2	15	39.5	-0.7
11	SHAM	3	3-42212	2015-07-27	16	A	6	Saanen	39.4	15	39.6	0.2
12	ISO+MEL	3	3-42212	2015-07-27	18	A	4.5	Saanen	39	15	39.5	0.5
13	CAUT	3	3-42212	2015-07-27	18	A	6.25	Saanen	39.7	15	39.9	0.2
14	MEL	3	3-42212	2015-07-27	18	A	7	Saanen	39.6	15	39.7	0.1
15	ISO	3	3-42212	2015-07-27	16	A	4.75	Saanen	38.9	15	39.6	0.7
16	MEL	1	1-42216	2015-07-31	22	A	5.9	Alpine	39.6	15	40.1	0.5
17	CAUT	1	1-42216	2015-07-31	23	A	7.8	Alpine	39.3	15	39.4	0.1
18	ISO	1	1-42216	2015-07-31	21	A	5.9	Saanen	39.4	15	39.2	-0.2
19	ISO+MEL	1	1-42216	2015-07-31	20	A	6.6	Saanen	38.9	15	39	0.1
20	SHAM	1	1-42216	2015-07-31	22	A	6.2	Saanen	39.8	15	39.2	-0.6
21	ISO+MEL	2	2-42216	2015-07-31	20	A	5.7	Saanen	39.6	15	39.1	-0.5
22	ISO	2	2-42216	2015-07-31	19	A	6.3	Saanen	39.5	15	39.6	0.1
23	SHAM	2	2-42216	2015-07-31	22	A	8.5	Saanen	39.7	15	39.7	0
24	CAUT	2	2-42216	2015-07-31	21	A	5.6	Saanen	39.8	15	39.9	0.1
25	MEL	2	2-42216	2015-07-31	19	A	5.8	Saanen	39.9	15	39.8	-0.1
26	ISO+MEL	3	3-42216	2015-07-31	19	A	4.4	Saanen	39.6	15	39.6	0
27	ISO	3	3-42216	2015-07-31	22	A	5.5	Saanen	39.7	15	38.7	-1
28	CAUT	3	3-42216	2015-07-31	20	A	5	Saanen	39.7	15	39	-0.7
29	SHAM	3	3-42216	2015-07-31	21	A	6.6	Alpine	39.9	15	39.6	-0.3
30	MEL	3	3-42216	2015-07-31	21	A	6.1	Saanen	39.6	15	39.7	0.1
31	SHAM	1	1-42219	2015-08-03	23	B	3.6	Saanen	39.7	15	40	0.3
32	ISO+MEL	1	1-42219	2015-08-03	23	A	5.9	Saanen	39.5	15	39.4	-0.1
33	MEL	1	1-42219	2015-08-03	24	A	5.5	Saanen	39.4	15	39.6	0.2
34	CAUT	1	1-42219	2015-08-03	23	A	6.3	Saanen	39.8	15	39.8	0
35	ISO	1	1-42219	2015-08-03	25	A	5	Saanen	40	15	39.2	-0.8
36	ISO	2	2-42219	2015-08-03	24	A	6.1	Saanen	38.1	15	39.3	1.2
37	MEL	2	2-42219	2015-08-03	23	A	5.2	Saanen	39.5	15	39.5	0
38	SHAM	2	2-42219	2015-08-03	22	A	7	Saanen	39.6	15	39.6	0
39	ISO+MEL	2	2-42219	2015-08-03	25	A	7	Saanen	39.5	15	38.9	-0.6
40	CAUT	2	2-42219	2015-08-03	22	A	5.6	Saanen	39.6	15	39.7	0.1
41	CAUT	3	3-42221	2015-08-05	17	B	5.8	Nubian	39.3	15	39.6	0.3
42	SHAM	3	3-42221	2015-08-05	16	A	5.8	Saanen	39.1	15	39.3	0.2
43	ISO	3	3-42221	2015-08-05	26	A	7.2	Saanen	39.4	15	39.5	0.1
44	MEL	3	3-42221	2015-08-05	25	A	5.5	Saanen	39.4	15	39.7	0.3
45	ISO+MEL	3	3-42221	2015-08-05	26	A	5.3	Saanen	39.5	15	39.2	-0.3
46	MEL	4	4-42221	2015-08-05	25	A	7.2	Saanen	39.6	15	39.7	0.1
47	CAUT	4	4-42221	2015-08-05	25	A	8.2	Saanen	39.5	15	39.4	-0.1
48	ISO+MEL	4	4-42221	2015-08-05	25	A	5.9	Saanen	39.5	15	39.2	-0.3
49	ISO	4	4-42221	2015-08-05	25	A	6.4	Saanen	39.5	15	39.5	0
50	SHAM	4	4-42221	2015-08-05	25	A	3.8	Saanen	38.7	15	38.8	0.1
1	ISO	1	1-42212	2015-07-27	19	A	6	Saanen	39.8	60	39.9	0.1
2	MEL	1	1-42212	2015-07-27	18	A	5	Saanen	39.4	60	39.2	-0.2
3	ISO+MEL	1	1-42212	2015-07-27	17	A	5.3	Saanen	39.6	60	39.8	0.2
4	SHAM	1	1-42212	2015-07-27	17	A	5	Saanen	40	60	39.6	-0.4
5	CAUT	1	1-42212	2015-07-27	17	A	4.75	Saanen	39.8	60	39.5	-0.3
6	CAUT	2	2-42212	2015-07-27	18	A	5.8	Saanen	39.7	60	39.7	0
7	SHAM	2	2-42212	2015-07-27	18	A	4.65	Toggenburg	39.4	60	39.5	0.1
9	ISO	2	2-42212	2015-07-27	16	A	5.6	Saanen	39.8	60	39.7	-0.1
10	ISO+MEL	2	2-42212	2015-07-27	18	A	5.7	Toggenburg	40.2	60	39.6	-0.6
11	SHAM	3	3-42212	2015-07-27	16	A	6	Saanen	39.4	60	39.5	0.1
12	ISO+MEL	3	3-42212	2015-07-27	18	A	4.5	Saanen	39	60	38.4	-0.6
13	CAUT	3	3-42212	2015-07-27	18	A	6.25	Saanen	39.7	60	39.5	-0.2
14	MEL	3	3-42212	2015-07-27	18	A	7	Saanen	39.6	60	39.5	-0.1
15	ISO	3	3-42212	2015-07-27	16	A	4.75	Saanen	38.9	60	39.9	1
16	MEL	1	1-42216	2015-07-31	22	A	5.9	Alpine	39.6	60	39.7	0.1
17	CAUT	1	1-42216	2015-07-31	23	A	7.8	Alpine	39.3	60	39.2	-0.1
18	ISO	1	1-42216	2015-07-31	21	A	5.9	Saanen	39.4	60	39.2	-0.2
19	ISO+MEL	1	1-42216	2015-07-31	20	A	6.6	Saanen	38.9	60	39	0.1
20	SHAM	1	1-42216	2015-07-31	22	A	6.2	Saanen	39.8	60	39.3	-0.5
21	ISO+MEL	2	2-42216	2015-07-31	20	A	5.7	Saanen	39.6	60	39.2	-0.4
22	ISO	2	2-42216	2015-07-31	19	A	6.3	Saanen	39.5	60	39.3	-0.2
23	SHAM	2	2-42216	2015-07-31	22	A	8.5	Saanen	39.7	60	39.5	-0.2
24	CAUT	2	2-42216	2015-07-31	21	A	5.6	Saanen	39.8	60	40	0.2
25	MEL	2	2-42216	2015-07-31	19	A	5.8	Saanen	39.9	60	39.3	-0.6
26	ISO+MEL	3	3-42216	2015-07-31	19	A	4.4	Saanen	39.6	60	39	-0.6
27	ISO	3	3-42216	2015-07-31	22	A	5.5	Saanen	39.7	60	39.4	-0.3
28	CAUT	3	3-42216	2015-07-31	20	A	5	Saanen	39.7	60	39.2	-0.5
29	SHAM	3	3-42216	2015-07-31	21	A	6.6	Alpine	39.9	60	39.4	-0.5
30	MEL	3	3-42216	2015-07-31	21	A	6.1	Saanen	39.6	60	39.7	0.1
31	SHAM	1	1-42219	2015-08-03	23	B	3.6	Saanen	39.7	60	39.6	-0.1
32	ISO+MEL	1	1-42219	2015-08-03	23	A	5.9	Saanen	39.5	60	39.5	0
33	MEL	1	1-42219	2015-08-03	24	A	5.5	Saanen	39.4	60	39.4	0
34	CAUT	1	1-42219	2015-08-03	23	A	6.3	Saanen	39.8	60	39.6	-0.2
35	ISO	1	1-42219	2015-08-03	25	A	5	Saanen	40	60	39.7	-0.3
36	ISO	2	2-42219	2015-08-03	24	A	6.1	Saanen	38.1	60	38.8	0.7
37	MEL	2	2-42219	2015-08-03	23	A	5.2	Saanen	39.5	60	39.6	0.1
38	SHAM	2	2-42219	2015-08-03	22	A	7	Saanen	39.6	60	39.4	-0.2
39	ISO+MEL	2	2-42219	2015-08-03	25	A	7	Saanen	39.5	60	39.3	-0.2
40	CAUT	2	2-42219	2015-08-03	22	A	5.6	Saanen	39.6	60	39.3	-0.3
41	CAUT	3	3-42221	2015-08-05	17	B	5.8	Nubian	39.3	60	39.6	0.3
42	SHAM	3	3-42221	2015-08-05	16	A	5.8	Saanen	39.1	60	39.3	0.2
43	ISO	3	3-42221	2015-08-05	26	A	7.2	Saanen	39.4	60	38.6	-0.8
44	MEL	3	3-42221	2015-08-05	25	A	5.5	Saanen	39.4	60	39.5	0.1
45	ISO+MEL	3	3-42221	2015-08-05	26	A	5.3	Saanen	39.5	60	39.1	-0.4
46	MEL	4	4-42221	2015-08-05	25	A	7.2	Saanen	39.6	60	39.7	0.1
47	CAUT	4	4-42221	2015-08-05	25	A	8.2	Saanen	39.5	60	39.3	-0.2
48	ISO+MEL	4	4-42221	2015-08-05	25	A	5.9	Saanen	39.5	60	39.6	0.1
49	ISO	4	4-42221	2015-08-05	25	A	6.4	Saanen	39.5	60	38.8	-0.7
50	SHAM	4	4-42221	2015-08-05	25	A	3.8	Saanen	38.7	60	38.2	-0.5
1	ISO	1	1-42212	2015-07-27	19	A	6	Saanen	39.8	120	40	0.2
2	MEL	1	1-42212	2015-07-27	18	A	5	Saanen	39.4	120	39.3	-0.1
3	ISO+MEL	1	1-42212	2015-07-27	17	A	5.3	Saanen	39.6	120	39.4	-0.2
4	SHAM	1	1-42212	2015-07-27	17	A	5	Saanen	40	120	39.5	-0.5
5	CAUT	1	1-42212	2015-07-27	17	A	4.75	Saanen	39.8	120	39.7	-0.1
6	CAUT	2	2-42212	2015-07-27	18	A	5.8	Saanen	39.7	120	39.9	0.2
7	SHAM	2	2-42212	2015-07-27	18	A	4.65	Toggenburg	39.4	120	39.7	0.3
9	ISO	2	2-42212	2015-07-27	16	A	5.6	Saanen	39.8	120	39.6	-0.2
10	ISO+MEL	2	2-42212	2015-07-27	18	A	5.7	Toggenburg	40.2	120	39.7	-0.5
11	SHAM	3	3-42212	2015-07-27	16	A	6	Saanen	39.4	120	39.6	0.2
12	ISO+MEL	3	3-42212	2015-07-27	18	A	4.5	Saanen	39	120	38.7	-0.3
13	CAUT	3	3-42212	2015-07-27	18	A	6.25	Saanen	39.7	120	39.4	-0.3
14	MEL	3	3-42212	2015-07-27	18	A	7	Saanen	39.6	120	39.6	0
15	ISO	3	3-42212	2015-07-27	16	A	4.75	Saanen	38.9	120	39.9	1
16	MEL	1	1-42216	2015-07-31	22	A	5.9	Alpine	39.6	120	39.6	0
17	CAUT	1	1-42216	2015-07-31	23	A	7.8	Alpine	39.3	120	39	-0.3
18	ISO	1	1-42216	2015-07-31	21	A	5.9	Saanen	39.4	120	39.4	0
19	ISO+MEL	1	1-42216	2015-07-31	20	A	6.6	Saanen	38.9	120	39.2	0.3
20	SHAM	1	1-42216	2015-07-31	22	A	6.2	Saanen	39.8	120	39.2	-0.6
21	ISO+MEL	2	2-42216	2015-07-31	20	A	5.7	Saanen	39.6	120	39.4	-0.2
22	ISO	2	2-42216	2015-07-31	19	A	6.3	Saanen	39.5	120	39.4	-0.1
23	SHAM	2	2-42216	2015-07-31	22	A	8.5	Saanen	39.7	120	39.3	-0.4
24	CAUT	2	2-42216	2015-07-31	21	A	5.6	Saanen	39.8	120	39.8	0
25	MEL	2	2-42216	2015-07-31	19	A	5.8	Saanen	39.9	120	39.3	-0.6
26	ISO+MEL	3	3-42216	2015-07-31	19	A	4.4	Saanen	39.6	120	39.5	-0.1
27	ISO	3	3-42216	2015-07-31	22	A	5.5	Saanen	39.7	120	40.1	0.4
28	CAUT	3	3-42216	2015-07-31	20	A	5	Saanen	39.7	120	39.3	-0.4
29	SHAM	3	3-42216	2015-07-31	21	A	6.6	Alpine	39.9	120	39.5	-0.4
30	MEL	3	3-42216	2015-07-31	21	A	6.1	Saanen	39.6	120	39.7	0.1
31	SHAM	1	1-42219	2015-08-03	23	B	3.6	Saanen	39.7	120	39.2	-0.5
32	ISO+MEL	1	1-42219	2015-08-03	23	A	5.9	Saanen	39.5	120	39	-0.5
33	MEL	1	1-42219	2015-08-03	24	A	5.5	Saanen	39.4	120	39.5	0.1
34	CAUT	1	1-42219	2015-08-03	23	A	6.3	Saanen	39.8	120	39.4	-0.4
35	ISO	1	1-42219	2015-08-03	25	A	5	Saanen	40	120	39.6	-0.4
36	ISO	2	2-42219	2015-08-03	24	A	6.1	Saanen	38.1	120	39.5	1.4
37	MEL	2	2-42219	2015-08-03	23	A	5.2	Saanen	39.5	120	39.3	-0.2
38	SHAM	2	2-42219	2015-08-03	22	A	7	Saanen	39.6	120	39.5	-0.1
39	ISO+MEL	2	2-42219	2015-08-03	25	A	7	Saanen	39.5	120	39.4	-0.1
40	CAUT	2	2-42219	2015-08-03	22	A	5.6	Saanen	39.6	120	39.6	0
41	CAUT	3	3-42221	2015-08-05	17	B	5.8	Nubian	39.3	120	39.2	-0.1
42	SHAM	3	3-42221	2015-08-05	16	A	5.8	Saanen	39.1	120	39.1	0
43	ISO	3	3-42221	2015-08-05	26	A	7.2	Saanen	39.4	120	39.3	-0.1
44	MEL	3	3-42221	2015-08-05	25	A	5.5	Saanen	39.4	120	38.8	-0.6
45	ISO+MEL	3	3-42221	2015-08-05	26	A	5.3	Saanen	39.5	120	39.1	-0.4
46	MEL	4	4-42221	2015-08-05	25	A	7.2	Saanen	39.6	120	39.3	-0.3
47	CAUT	4	4-42221	2015-08-05	25	A	8.2	Saanen	39.5	120	39.5	0
48	ISO+MEL	4	4-42221	2015-08-05	25	A	5.9	Saanen	39.5	120	39.4	-0.1
49	ISO	4	4-42221	2015-08-05	25	A	6.4	Saanen	39.5	120	39.2	-0.3
50	SHAM	4	4-42221	2015-08-05	25	A	3.8	Saanen	38.7	120	38.7	0

## Sheet: Body Weight
Kid_ID!	Trt!	Pen!	Rep!	Trt_date!	Age_at_trt!	Farm!	Weight	Breed!	Time!	Baseline	Body weight	Change
1	ISO	1	1-42212	2015-07-27	19	A	6	Saanen	2	6	6.95	0.95
2	MEL	1	1-42212	2015-07-27	18	A	5	Saanen	2	5	5.45	0.45
3	ISO+MEL	1	1-42212	2015-07-27	17	A	5.3	Saanen	2	5.3	5.95	0.65
4	SHAM	1	1-42212	2015-07-27	17	A	5	Saanen	2	5	5.85	0.85
5	CAUT	1	1-42212	2015-07-27	17	A	4.75	Saanen	2	4.75	5.15	0.4
6	CAUT	2	2-42212	2015-07-27	18	A	5.8	Saanen	2	5.8	6.45	0.65
7	SHAM	2	2-42212	2015-07-27	18	A	4.65	Toggenburg	2	4.65	5.45	0.8
9	ISO	2	2-42212	2015-07-27	16	A	5.6	Saanen	2	5.6	6.45	0.85
10	ISO+MEL	2	2-42212	2015-07-27	18	A	5.7	Toggenburg	2	5.7	6.15	0.45
11	SHAM	3	3-42212	2015-07-27	16	A	6	Saanen	2	6	6.15	0.15
12	ISO+MEL	3	3-42212	2015-07-27	18	A	4.5	Saanen	2	4.5	4.85	0.35
13	CAUT	3	3-42212	2015-07-27	18	A	6.25	Saanen	2	6.25	6.25	0
14	MEL	3	3-42212	2015-07-27	18	A	7	Saanen	2	7	7.45	0.45
15	ISO	3	3-42212	2015-07-27	16	A	4.75	Saanen	2	4.75	4.95	0.2
16	MEL	1	1-42216	2015-07-31	22	A	5.9	Alpine	2	5.9	5.75	-0.15
17	CAUT	1	1-42216	2015-07-31	23	A	7.8	Alpine	2	7.8	7.65	-0.15
18	ISO	1	1-42216	2015-07-31	21	A	5.9	Saanen	2	5.9	6.15	0.25
19	ISO+MEL	1	1-42216	2015-07-31	20	A	6.6	Saanen	2	6.6	6.75	0.15
20	SHAM	1	1-42216	2015-07-31	22	A	6.2	Saanen	2	6.2	6.05	-0.15
21	ISO+MEL	2	2-42216	2015-07-31	20	A	5.7	Saanen	2	5.7	6.05	0.35
22	ISO	2	2-42216	2015-07-31	19	A	6.3	Saanen	2	6.3	7.05	0.75
23	SHAM	2	2-42216	2015-07-31	22	A	8.5	Saanen	2	8.5	6.45	-2.05
24	CAUT	2	2-42216	2015-07-31	21	A	5.6	Saanen	2	5.6	5.15	-0.45
25	MEL	2	2-42216	2015-07-31	19	A	5.8	Saanen	2	5.8	6.25	0.45
26	ISO+MEL	3	3-42216	2015-07-31	19	A	4.4	Saanen	2	4.4	5.15	0.75
27	ISO	3	3-42216	2015-07-31	22	A	5.5	Saanen	2	5.5	5.85	0.35
28	CAUT	3	3-42216	2015-07-31	20	A	5	Saanen	2	5	5.35	0.35
29	SHAM	3	3-42216	2015-07-31	21	A	6.6	Alpine	2	6.6	7.05	0.45
30	MEL	3	3-42216	2015-07-31	21	A	6.1	Saanen	2	6.1	6.05	-0.05
31	SHAM	1	1-42219	2015-08-03	23	B	3.6	Saanen	2	3.6	4.8	1.2
32	ISO+MEL	1	1-42219	2015-08-03	23	A	5.9	Saanen	2	5.9	6.9	1
33	MEL	1	1-42219	2015-08-03	24	A	5.5	Saanen	2	5.5	6.4	0.9
34	CAUT	1	1-42219	2015-08-03	23	A	6.3	Saanen	2	6.3	7.6	1.3
35	ISO	1	1-42219	2015-08-03	25	A	5	Saanen	2	5	5.8	0.8
36	ISO	2	2-42219	2015-08-03	24	A	6.1	Saanen	2	6.1	7	0.9
37	MEL	2	2-42219	2015-08-03	23	A	5.2	Saanen	2	5.2	6	0.8
38	SHAM	2	2-42219	2015-08-03	22	A	7	Saanen	2	7	8.3	1.3
39	ISO+MEL	2	2-42219	2015-08-03	25	A	7	Saanen	2	7	8	1
40	CAUT	2	2-42219	2015-08-03	22	A	5.6	Saanen	2	5.6	6.2	0.6
41	CAUT	3	3-42221	2015-08-05	17	B	5.8	Nubian	2	5.8	6.2	0.4
42	SHAM	3	3-42221	2015-08-05	16	A	5.8	Saanen	2	5.8	6.2	0.4
43	ISO	3	3-42221	2015-08-05	26	A	7.2	Saanen	2	7.2	7.8	0.6
44	MEL	3	3-42221	2015-08-05	25	A	5.5	Saanen	2	5.5	6.3	0.8
45	ISO+MEL	3	3-42221	2015-08-05	26	A	5.3	Saanen	2	5.3	6.2	0.9
46	MEL	4	4-42221	2015-08-05	25	A	7.2	Saanen	2	7.2	7.3	0.1
47	CAUT	4	4-42221	2015-08-05	25	A	8.2	Saanen	2	8.2	8.7	0.5
48	ISO+MEL	4	4-42221	2015-08-05	25	A	5.9	Saanen	2	5.9	6.3	0.4
49	ISO	4	4-42221	2015-08-05	25	A	6.4	Saanen	2	6.4	7.3	0.9
50	SHAM	4	4-42221	2015-08-05	25	A	3.8	Saanen	2	3.8	4.3	0.5
1	ISO	1	1-42212	2015-07-27	19	A	6	Saanen	3	6	7.1	1.1
2	MEL	1	1-42212	2015-07-27	18	A	5	Saanen	3	5	5.4	0.4
3	ISO+MEL	1	1-42212	2015-07-27	17	A	5.3	Saanen	3	5.3	6.2	0.9
4	SHAM	1	1-42212	2015-07-27	17	A	5	Saanen	3	5	6.2	1.2
5	CAUT	1	1-42212	2015-07-27	17	A	4.75	Saanen	3	4.75	5.3	0.55
6	CAUT	2	2-42212	2015-07-27	18	A	5.8	Saanen	3	5.8	6.6	0.8
7	SHAM	2	2-42212	2015-07-27	18	A	4.65	Toggenburg	3	4.65	5.1	0.45
9	ISO	2	2-42212	2015-07-27	16	A	5.6	Saanen	3	5.6	5.9	0.3
10	ISO+MEL	2	2-42212	2015-07-27	18	A	5.7	Toggenburg	3	5.7	5.9	0.2
11	SHAM	3	3-42212	2015-07-27	16	A	6	Saanen	3	6	6.7	0.7
12	ISO+MEL	3	3-42212	2015-07-27	18	A	4.5	Saanen	3	4.5	5	0.5
13	CAUT	3	3-42212	2015-07-27	18	A	6.25	Saanen	3	6.25	6.4	0.15
14	MEL	3	3-42212	2015-07-27	18	A	7	Saanen	3	7	7.7	0.7
15	ISO	3	3-42212	2015-07-27	16	A	4.75	Saanen	3	4.75	5.1	0.35
16	MEL	1	1-42216	2015-07-31	22	A	5.9	Alpine	3	5.9	5.75	-0.15
17	CAUT	1	1-42216	2015-07-31	23	A	7.8	Alpine	3	7.8	8.05	0.25
18	ISO	1	1-42216	2015-07-31	21	A	5.9	Saanen	3	5.9	5.95	0.05
19	ISO+MEL	1	1-42216	2015-07-31	20	A	6.6	Saanen	3	6.6	6.95	0.35
20	SHAM	1	1-42216	2015-07-31	22	A	6.2	Saanen	3	6.2	5.85	-0.35
21	ISO+MEL	2	2-42216	2015-07-31	20	A	5.7	Saanen	3	5.7	6.05	0.35
22	ISO	2	2-42216	2015-07-31	19	A	6.3	Saanen	3	6.3	6.95	0.65
23	SHAM	2	2-42216	2015-07-31	22	A	8.5	Saanen	3	8.5	6.35	-2.15
24	CAUT	2	2-42216	2015-07-31	21	A	5.6	Saanen	3	5.6	5.25	-0.35
25	MEL	2	2-42216	2015-07-31	19	A	5.8	Saanen	3	5.8	6.25	0.45
26	ISO+MEL	3	3-42216	2015-07-31	19	A	4.4	Saanen	3	4.4	5.35	0.95
27	ISO	3	3-42216	2015-07-31	22	A	5.5	Saanen	3	5.5	6.05	0.55
28	CAUT	3	3-42216	2015-07-31	20	A	5	Saanen	3	5	5.35	0.35
29	SHAM	3	3-42216	2015-07-31	21	A	6.6	Alpine	3	6.6	7.75	1.15
30	MEL	3	3-42216	2015-07-31	21	A	6.1	Saanen	3	6.1	6.35	0.25
31	SHAM	1	1-42219	2015-08-03	23	B	3.6	Saanen	3	3.6	6.6	3
32	ISO+MEL	1	1-42219	2015-08-03	23	A	5.9	Saanen	3	5.9	7.2	1.3
33	MEL	1	1-42219	2015-08-03	24	A	5.5	Saanen	3	5.5	6.7	1.2
34	CAUT	1	1-42219	2015-08-03	23	A	6.3	Saanen	3	6.3	7.6	1.3
35	ISO	1	1-42219	2015-08-03	25	A	5	Saanen	3	5	5.9	0.9
36	ISO	2	2-42219	2015-08-03	24	A	6.1	Saanen	3	6.1	7.1	1
37	MEL	2	2-42219	2015-08-03	23	A	5.2	Saanen	3	5.2	6	0.8
38	SHAM	2	2-42219	2015-08-03	22	A	7	Saanen	3	7	8.6	1.6
39	ISO+MEL	2	2-42219	2015-08-03	25	A	7	Saanen	3	7	8	1
40	CAUT	2	2-42219	2015-08-03	22	A	5.6	Saanen	3	5.6	6.2	0.6
41	CAUT	3	3-42221	2015-08-05	17	B	5.8	Nubian	3	5.8	6.5	0.7
42	SHAM	3	3-42221	2015-08-05	16	A	5.8	Saanen	3	5.8	6.8	1
43	ISO	3	3-42221	2015-08-05	26	A	7.2	Saanen	3	7.2	8.2	1
44	MEL	3	3-42221	2015-08-05	25	A	5.5	Saanen	3	5.5	6.8	1.3
45	ISO+MEL	3	3-42221	2015-08-05	26	A	5.3	Saanen	3	5.3	6.4	1.1
46	MEL	4	4-42221	2015-08-05	25	A	7.2	Saanen	3	7.2	7.7	0.5
47	CAUT	4	4-42221	2015-08-05	25	A	8.2	Saanen	3	8.2	9	0.8
48	ISO+MEL	4	4-42221	2015-08-05	25	A	5.9	Saanen	3	5.9	6.3	0.4
49	ISO	4	4-42221	2015-08-05	25	A	6.4	Saanen	3	6.4	7.7	1.3
50	SHAM	4	4-42221	2015-08-05	25	A	3.8	Saanen	3	3.8	4.7	0.9
1	ISO	1	1-42212	2015-07-27	19	A	6	Saanen
2	MEL	1	1-42212	2015-07-27	18	A	5	Saanen
3	ISO+MEL	1	1-42212	2015-07-27	17	A	5.3	Saanen
4	SHAM	1	1-42212	2015-07-27	17	A	5	Saanen
5	CAUT	1	1-42212	2015-07-27	17	A	4.75	Saanen
6	CAUT	2	2-42212	2015-07-27	18	A	5.8	Saanen
7	SHAM	2	2-42212	2015-07-27	18	A	4.65	Toggenburg
9	ISO	2	2-42212	2015-07-27	16	A	5.6	Saanen
10	ISO+MEL	2	2-42212	2015-07-27	18	A	5.7	Toggenburg
11	SHAM	3	3-42212	2015-07-27	16	A	6	Saanen
12	ISO+MEL	3	3-42212	2015-07-27	18	A	4.5	Saanen
13	CAUT	3	3-42212	2015-07-27	18	A	6.25	Saanen
14	MEL	3	3-42212	2015-07-27	18	A	7	Saanen
15	ISO	3	3-42212	2015-07-27	16	A	4.75	Saanen
16	MEL	1	1-42216	2015-07-31	22	A	5.9	Alpine
17	CAUT	1	1-42216	2015-07-31	23	A	7.8	Alpine
18	ISO	1	1-42216	2015-07-31	21	A	5.9	Saanen
19	ISO+MEL	1	1-42216	2015-07-31	20	A	6.6	Saanen
20	SHAM	1	1-42216	2015-07-31	22	A	6.2	Saanen
21	ISO+MEL	2	2-42216	2015-07-31	20	A	5.7	Saanen
22	ISO	2	2-42216	2015-07-31	19	A	6.3	Saanen
23	SHAM	2	2-42216	2015-07-31	22	A	8.5	Saanen
24	CAUT	2	2-42216	2015-07-31	21	A	5.6	Saanen
25	MEL	2	2-42216	2015-07-31	19	A	5.8	Saanen
26	ISO+MEL	3	3-42216	2015-07-31	19	A	4.4	Saanen
27	ISO	3	3-42216	2015-07-31	22	A	5.5	Saanen
28	CAUT	3	3-42216	2015-07-31	20	A	5	Saanen
29	SHAM	3	3-42216	2015-07-31	21	A	6.6	Alpine
30	MEL	3	3-42216	2015-07-31	21	A	6.1	Saanen
31	SHAM	1	1-42219	2015-08-03	23	B	3.6	Saanen
32	ISO+MEL	1	1-42219	2015-08-03	23	A	5.9	Saanen
33	MEL	1	1-42219	2015-08-03	24	A	5.5	Saanen
34	CAUT	1	1-42219	2015-08-03	23	A	6.3	Saanen
35	ISO	1	1-42219	2015-08-03	25	A	5	Saanen
36	ISO	2	2-42219	2015-08-03	24	A	6.1	Saanen
37	MEL	2	2-42219	2015-08-03	23	A	5.2	Saanen
38	SHAM	2	2-42219	2015-08-03	22	A	7	Saanen
39	ISO+MEL	2	2-42219	2015-08-03	25	A	7	Saanen
40	CAUT	2	2-42219	2015-08-03	22	A	5.6	Saanen
41	CAUT	3	3-42221	2015-08-05	17	B	5.8	Nubian
42	SHAM	3	3-42221	2015-08-05	16	A	5.8	Saanen
43	ISO	3	3-42221	2015-08-05	26	A	7.2	Saanen
44	MEL	3	3-42221	2015-08-05	25	A	5.5	Saanen
45	ISO+MEL	3	3-42221	2015-08-05	26	A	5.3	Saanen
46	MEL	4	4-42221	2015-08-05	25	A	7.2	Saanen
47	CAUT	4	4-42221	2015-08-05	25	A	8.2	Saanen
48	ISO+MEL	4	4-42221	2015-08-05	25	A	5.9	Saanen
49	ISO	4	4-42221	2015-08-05	25	A	6.4	Saanen
50	SHAM	4	4-42221	2015-08-05	25	A	3.8	Saanen

## Sheet: Behaviour 5 min intervals
Kid_ID!	Trt!	Pen!	Rep!	Trt_date!	Age_at_trt!	Farm!	Weight	Breed!	5MinSlot	TimeSlot!	BodyShake_NumBouts	Feed_NumBouts	Groom_NumBouts	HeadScratch_NumBouts	HeadShake_NumBouts	BodyShake_Cov_NumBouts	Feed_Cov_NumBouts	Groom_Cov_NumBouts	HeadScratch_Cov_NumBouts	HeadShake_Cov_NumBouts
1	ISO	1	42222	42212	19	A	6	Saanen	0	0-5	0	2	0	0	1	0.416667	3.58333	0.166667	1.58333	3
2	MEL	1	42222	42212	18	A	5	Saanen	0	0-5	1	10	0	0	5	0.166667	0.666667	0	0.166667	1.08333
3	ISO+MEL	1	42222	42212	17	A	5.3	Saanen	0	0-5	0	2	0	0	7	0.25	3.16667	0.25	0.166667	1.41667
4	SHAM	1	42222	42212	17	A	5	Saanen	0	0-5	0	0	0	0	8	0.166667	3	0.75	0.666667	0.666667
5	CAUT	1	42222	42212	17	A	4.75	Saanen	0	0-5	2	1	0	0	5	0.0833333	2	0.25	0.25	0.25
6	CAUT	2	42232	42212	18	A	5.8	Saanen	0	0-5	0	1	0	1	5	0	0	1.5	1.25	0.833333
7	SHAM	2	42232	42212	18	A	4.65	Alpine	0	0-5	1	0	0	0	5	0	0	0.416667	0.166667	0.25
9	ISO	2	42232	42212	16	A	5.6	Saanen	0	0-5	0	5	0	1	5	0	0	0.166667	0.166667	0.333333
10	ISO+MEL	2	42232	42212	18	A	5.7	Sable	0	0-5	0	5	0	0	3	0	0	1.25	0.333333	0.416667
11	SHAM	3	42242	42212	16	A	6	Saanen	0	0-5	0	1	0	0	5	0	0	0	0.166667	0.166667
12	ISO+MEL	3	42242	42212	18	A	4.5	Saanen	0	0-5	0	11	0	0	5	0	0	0.25	0	0.333333
13	CAUT	3	42242	42212	18	A	6.25	Saanen	0	0-5	1	2	0	1	4	0	0	0.5	0.333333	0.583333
14	MEL	3	42242	42212	18	A	7	Saanen	0	0-5	0	7	0	0	1	0.166667	0.416667	0.416667	0.333333	1.33333
15	ISO	3	42242	42212	16	A	4.75	Saanen	0	0-5	0	0	0	0	1	0	0.0833333	0.833333	0.25	0.333333
16	MEL	3	42246	42216	22	A	5.9	Sable	0	0-5	0	0	0	0	0	0	0	0	0	0
17	CAUT	3	42246	42216	23	A	7.8	Alpine	0	0-5	0	0	0	0	0	0	0	0	0	0
18	ISO	3	42246	42216	21	A	5.9	Saanen	0	0-5	0	0	0	0	0	0	0	0	0	0
19	ISO+MEL	3	42246	42216	20	A	6.2	Saanen	0	0-5	0	0	0	0	0	0	0	0	0	0
20	SHAM	3	42246	42216	22	A	6.2	Saanen	0	0-5	0	0	0	0	0	0	0	0	0	0
21	ISO+MEL	4	42256	42216	20	A	5.7	Saanen	0	0-5	1	3	0	0	5	0	0	0	0	0
22	ISO	4	42256	42216	19	A	6.3	Saanen	0	0-5	0	1	0	2	4	0	0	0	0	0
23	SHAM	4	42256	42216	22	A	8.5	Saanen	0	0-5	0	0	0	0	1	0	0	0	0.166667	0.0833333
24	CAUT	4	42256	42216	21	A	5.6	Saanen	0	0-5	2	0	0	2	4	0	0	0	0	0
25	MEL	4	42256	42216	19	A	5.8	Milan	0	0-5	1	1	0	0	3	0.0833333	0	0.166667	0.25	0.583333
26	ISO+MEL	5	42266	42216	19	A	4.4	Saanen	0	0-5	0	0	0	0	1	0	0	0	0	0
27	ISO	5	42266	42216	22	A	5.5	Saanen	0	0-5	0	4	0	0	0	0	0	0.0833333	0	0.166667
28	CAUT	5	42266	42216	20	A	5	Saanen	0	0-5	0	5	0	0	2	0	0	0.25	0	0
29	SHAM	5	42266	42216	21	A	6.6	Alpine	0	0-5	0	0	0	0	4	0	0	0.0833333	0	0
30	MEL	5	42266	42216	21	A	6.1	Saanen	0	0-5	0	8	0	0	2	0	0.166667	0.416667	0.333333	0.333333
31	SHAM	1	42229	42219	23	B	3.6	Saanen	0	0-5	2	3	0	0	6	0.166667	0.0833333	0.666667	0.75	3.25
32	ISO+MEL	1	42229	42219	23	A	5.9	Saanen	0	0-5	0	4	0	2	3	0.25	0.166667	2.41667	2.5	3.41667
33	MEL	1	42229	42219	24	A	5.5	Saanen	0	0-5	2	0	1	2	9	0.333333	0.333333	1.33333	1.5	1.75
34	CAUT	1	42229	42219	23	A	6.3	Saanen	0	0-5	1	0	0	0	7	0.0833333	0.25	0.75	0.5	2.08333
35	ISO	1	42229	42219	25	A	5	Saanen	0	0-5	1	2	0	0	1	0.333333	0	1.83333	1.25	2.33333
36	ISO	2	42239	42219	24	A	6.1	Saanen	0	0-5	1	0	2	5	11	0.166667	0	2.58333	1.66667	3.5
37	MEL	2	42239	42219	23	A	5.2	Saanen	0	0-5	0	0	0	0	2	0.0833333	0	0.25	0.166667	0.333333
38	SHAM	2	42239	42219	22	A	7	Saanen	0	0-5	0	1	0	0	3	0	0	0.25	0.0833333	0.0833333
39	ISO+MEL	2	42239	42219	25	A	7	Saanen	0	0-5	0	1	0	0	1	0	0	0	0	0
40	CAUT	2	42239	42219	22	A	5.6	Saanen	0	0-5	0	0	0	0	7	0	0	0.166667	0.0833333	0.0833333
41	CAUT	3	42251	42221	17	B	5.8	Nubian	0	0-5	0	0	0	0	1	0.25	0.0833333	1.25	0.416667	0.833333
42	SHAM	3	42251	42221	16	A	5.8	Saanen	0	0-5	1	0	0	0	4	0.0833333	0.166667	0.0833333	0	1
43	ISO	3	42251	42221	26	A	7.2	Saanen	0	0-5	1	4	0	0	4	0.166667	0.833333	0.916667	0.25	1.5
44	MEL	3	42251	42221	25	A	5.5	Saanen	0	0-5	1	2	0	1	7	0	0	0.166667	0.0833333	0.0833333
45	ISO+MEL	3	42251	42221	26	A	5.3	Saanen	0	0-5	1	0	0	0	0	0	0	0	0.166667	0.166667
46	MEL	4	42261	42221	25	A	7.2	Saanen	0	0-5	1	0	1	0	5	0	0	0.166667	0.25	0.166667
47	CAUT	4	42261	42221	25	A	8.2	Saanen	0	0-5	1	4	0	0	4	0.0833333	0	0	0.0833333	0.166667
48	ISO+MEL	4	42261	42221	25	A	5.9	Saanen	0	0-5	0	11	0	0	3	0.0833333	0	0.666667	0.5	1.08333
49	ISO	4	42261	42221	25	A	6.4	Saanen	0	0-5	0	2	0	0	2	0	0	0	0	0
50	SHAM	4	42261	42221	25	A	3.8	Saanen	0	0-5	0	3	0	0	0	0	0	0	0	0
1	ISO	1	42222	42212	19	A	6	Saanen	1	5-10	0	1	0	1	3	0.416667	3.58333	0.166667	1.58333	3
2	MEL	1	42222	42212	18	A	5	Saanen	1	5-10	1	1	0	1	11	0.166667	0.666667	0	0.166667	1.08333
3	ISO+MEL	1	42222	42212	17	A	5.3	Saanen	1	5-10	0	1	2	0	3	0.25	3.16667	0.25	0.166667	1.41667
4	SHAM	1	42222	42212	17	A	5	Saanen	1	5-10	0	2	0	0	3	0.166667	3	0.75	0.666667	0.666667
5	CAUT	1	42222	42212	17	A	4.75	Saanen	1	5-10	0	0	0	0	2	0.0833333	2	0.25	0.25	0.25
6	CAUT	2	42232	42212	18	A	5.8	Saanen	1	5-10	1	1	0	4	5	0	0	1.5	1.25	0.833333
7	SHAM	2	42232	42212	18	A	4.65	Alpine	1	5-10	0	0	0	0	3	0	0	0.416667	0.166667	0.25
9	ISO	2	42232	42212	16	A	5.6	Saanen	1	5-10	0	0	1	0	1	0	0	0.166667	0.166667	0.333333
10	ISO+MEL	2	42232	42212	18	A	5.7	Sable	1	5-10	0	0	0	0	1	0	0	1.25	0.333333	0.416667
11	SHAM	3	42242	42212	16	A	6	Saanen	1	5-10	0	2	0	0	0	0	0	0	0.166667	0.166667
12	ISO+MEL	3	42242	42212	18	A	4.5	Saanen	1	5-10	2	0	0	1	8	0	0	0.25	0	0.333333
13	CAUT	3	42242	42212	18	A	6.25	Saanen	1	5-10	3	3	0	0	5	0	0	0.5	0.333333	0.583333
14	MEL	3	42242	42212	18	A	7	Saanen	1	5-10	0	4	0	0	2	0.166667	0.416667	0.416667	0.333333	1.33333
15	ISO	3	42242	42212	16	A	4.75	Saanen	1	5-10	0	0	1	0	1	0	0.0833333	0.833333	0.25	0.333333
16	MEL	3	42246	42216	22	A	5.9	Sable	1	5-10	0	0	0	0	0	0	0	0	0	0
17	CAUT	3	42246	42216	23	A	7.8	Alpine	1	5-10	0	0	0	0	0	0	0	0	0	0
18	ISO	3	42246	42216	21	A	5.9	Saanen	1	5-10	0	0	0	0	0	0	0	0	0	0
19	ISO+MEL	3	42246	42216	20	A	6.2	Saanen	1	5-10	0	0	0	0	0	0	0	0	0	0
20	SHAM	3	42246	42216	22	A	6.2	Saanen	1	5-10	0	0	0	0	0	0	0	0	0	0
21	ISO+MEL	4	42256	42216	20	A	5.7	Saanen	1	5-10	0	1	0	0	2	0	0	0	0	0
22	ISO	4	42256	42216	19	A	6.3	Saanen	1	5-10	0	0	0	0	1	0	0	0	0	0
23	SHAM	4	42256	42216	22	A	8.5	Saanen	1	5-10	0	0	2	0	1	0	0	0	0.166667	0.0833333
24	CAUT	4	42256	42216	21	A	5.6	Saanen	1	5-10	0	0	0	1	1	0	0	0	0	0
25	MEL	4	42256	42216	19	A	5.8	Milan	1	5-10	0	0	0	0	1	0.0833333	0	0.166667	0.25	0.583333
26	ISO+MEL	5	42266	42216	19	A	4.4	Saanen	1	5-10	0	0	0	0	0	0	0	0	0	0
27	ISO	5	42266	42216	22	A	5.5	Saanen	1	5-10	1	2	0	1	2	0	0	0.0833333	0	0.166667
28	CAUT	5	42266	42216	20	A	5	Saanen	1	5-10	1	0	0	2	8	0	0	0.25	0	0
29	SHAM	5	42266	42216	21	A	6.6	Alpine	1	5-10	0	0	0	0	4	0	0	0.0833333	0	0
30	MEL	5	42266	42216	21	A	6.1	Saanen	1	5-10	1	6	0	0	3	0	0.166667	0.416667	0.333333	0.333333
31	SHAM	1	42229	42219	23	B	3.6	Saanen	1	5-10	1	0	0	0	3	0.166667	0.0833333	0.666667	0.75	3.25
32	ISO+MEL	1	42229	42219	23	A	5.9	Saanen	1	5-10	1	0	1	0	2	0.25	0.166667	2.41667	2.5	3.41667
33	MEL	1	42229	42219	24	A	5.5	Saanen	1	5-10	0	0	3	1	2	0.333333	0.333333	1.33333	1.5	1.75
34	CAUT	1	42229	42219	23	A	6.3	Saanen	1	5-10	0	0	0	0	1	0.0833333	0.25	0.75	0.5	2.08333
35	ISO	1	42229	42219	25	A	5	Saanen	1	5-10	1	0	0	0	2	0.333333	0	1.83333	1.25	2.33333
36	ISO	2	42239	42219	24	A	6.1	Saanen	1	5-10	0	0	0	0	2	0.166667	0	2.58333	1.66667	3.5
37	MEL	2	42239	42219	23	A	5.2	Saanen	1	5-10	0	2	0	0	1	0.0833333	0	0.25	0.166667	0.333333
38	SHAM	2	42239	42219	22	A	7	Saanen	1	5-10	1	0	0	0	7	0	0	0.25	0.0833333	0.0833333
39	ISO+MEL	2	42239	42219	25	A	7	Saanen	1	5-10	0	0	0	0	1	0	0	0	0	0
40	CAUT	2	42239	42219	22	A	5.6	Saanen	1	5-10	0	1	0	2	2	0	0	0.166667	0.0833333	0.0833333
41	CAUT	3	42251	42221	17	B	5.8	Nubian	1	5-10	0	0	3	0	1	0.25	0.0833333	1.25	0.416667	0.833333
42	SHAM	3	42251	42221	16	A	5.8	Saanen	1	5-10	0	0	0	1	4	0.0833333	0.166667	0.0833333	0	1
43	ISO	3	42251	42221	26	A	7.2	Saanen	1	5-10	0	0	1	0	3	0.166667	0.833333	0.916667	0.25	1.5
44	MEL	3	42251	42221	25	A	5.5	Saanen	1	5-10	0	0	0	0	6	0	0	0.166667	0.0833333	0.0833333
45	ISO+MEL	3	42251	42221	26	A	5.3	Saanen	1	5-10	0	0	0	0	1	0	0	0	0.166667	0.166667
46	MEL	4	42261	42221	25	A	7.2	Saanen	1	5-10	1	0	1	0	2	0	0	0.166667	0.25	0.166667
47	CAUT	4	42261	42221	25	A	8.2	Saanen	1	5-10	0	1	0	1	4	0.0833333	0	0	0.0833333	0.166667
48	ISO+MEL	4	42261	42221	25	A	5.9	Saanen	1	5-10	0	5	0	0	4	0.0833333	0	0.666667	0.5	1.08333
49	ISO	4	42261	42221	25	A	6.4	Saanen	1	5-10	0	0	1	1	2	0	0	0	0	0
50	SHAM	4	42261	42221	25	A	3.8	Saanen	1	5-10	1	1	0	0	4	0	0	0	0	0
1	ISO	1	42222	42212	19	A	6	Saanen	2	10-15	1	0	0	0	3	0.416667	3.58333	0.166667	1.58333	3
2	MEL	1	42222	42212	18	A	5	Saanen	2	10-15	1	0	1	0	8	0.166667	0.666667	0	0.166667	1.08333
3	ISO+MEL	1	42222	42212	17	A	5.3	Saanen	2	10-15	1	0	0	0	3	0.25	3.16667	0.25	0.166667	1.41667
4	SHAM	1	42222	42212	17	A	5	Saanen	2	10-15	0	0	1	5	2	0.166667	3	0.75	0.666667	0.666667
5	CAUT	1	42222	42212	17	A	4.75	Saanen	2	10-15	0	0	1	0	1	0.0833333	2	0.25	0.25	0.25
6	CAUT	2	42232	42212	18	A	5.8	Saanen	2	10-15	0	0	0	0	0	0	0	1.5	1.25	0.833333
7	SHAM	2	42232	42212	18	A	4.65	Alpine	2	10-15	0	0	1	0	0	0	0	0.416667	0.166667	0.25
9	ISO	2	42232	42212	16	A	5.6	Saanen	2	10-15	0	0	0	0	1	0	0	0.166667	0.166667	0.333333
10	ISO+MEL	2	42232	42212	18	A	5.7	Sable	2	10-15	0	0	0	0	2	0	0	1.25	0.333333	0.416667
11	SHAM	3	42242	42212	16	A	6	Saanen	2	10-15	1	7	0	0	3	0	0	0	0.166667	0.166667
12	ISO+MEL	3	42242	42212	18	A	4.5	Saanen	2	10-15	1	10	0	0	5	0	0	0.25	0	0.333333
13	CAUT	3	42242	42212	18	A	6.25	Saanen	2	10-15	2	6	0	2	4	0	0	0.5	0.333333	0.583333
14	MEL	3	42242	42212	18	A	7	Saanen	2	10-15	1	0	0	0	3	0.166667	0.416667	0.416667	0.333333	1.33333
15	ISO	3	42242	42212	16	A	4.75	Saanen	2	10-15	0	0	0	0	1	0	0.0833333	0.833333	0.25	0.333333
16	MEL	3	42246	42216	22	A	5.9	Sable	2	10-15	0	0	0	0	0	0	0	0	0	0
17	CAUT	3	42246	42216	23	A	7.8	Alpine	2	10-15	0	0	0	0	0	0	0	0	0	0
18	ISO	3	42246	42216	21	A	5.9	Saanen	2	10-15	0	0	0	0	0	0	0	0	0	0
19	ISO+MEL	3	42246	42216	20	A	6.2	Saanen	2	10-15	0	0	0	0	0	0	0	0	0	0
20	SHAM	3	42246	42216	22	A	6.2	Saanen	2	10-15	0	0	0	0	0	0	0	0	0	0
21	ISO+MEL	4	42256	42216	20	A	5.7	Saanen	2	10-15	1	0	0	0	4	0	0	0	0	0
22	ISO	4	42256	42216	19	A	6.3	Saanen	2	10-15	1	0	0	2	1	0	0	0	0	0
23	SHAM	4	42256	42216	22	A	8.5	Saanen	2	10-15	1	0	0	1	2	0	0	0	0.166667	0.0833333
24	CAUT	4	42256	42216	21	A	5.6	Saanen	2	10-15	0	0	0	0	1	0	0	0	0	0
25	MEL	4	42256	42216	19	A	5.8	Milan	2	10-15	0	1	0	0	1	0.0833333	0	0.166667	0.25	0.583333
26	ISO+MEL	5	42266	42216	19	A	4.4	Saanen	2	10-15	0	1	1	0	1	0	0	0	0	0
27	ISO	5	42266	42216	22	A	5.5	Saanen	2	10-15	0	1	1	3	5	0	0	0.0833333	0	0.166667
28	CAUT	5	42266	42216	20	A	5	Saanen	2	10-15	0	1	0	0	1	0	0	0.25	0	0
29	SHAM	5	42266	42216	21	A	6.6	Alpine	2	10-15	0	0	0	0	4	0	0	0.0833333	0	0
30	MEL	5	42266	42216	21	A	6.1	Saanen	2	10-15	0	0	0	0	2	0	0.166667	0.416667	0.333333	0.333333
31	SHAM	1	42229	42219	23	B	3.6	Saanen	2	10-15	1	0	0	0	1	0.166667	0.0833333	0.666667	0.75	3.25
32	ISO+MEL	1	42229	42219	23	A	5.9	Saanen	2	10-15	0	0	1	2	4	0.25	0.166667	2.41667	2.5	3.41667
33	MEL	1	42229	42219	24	A	5.5	Saanen	2	10-15	1	0	0	0	1	0.333333	0.333333	1.33333	1.5	1.75
34	CAUT	1	42229	42219	23	A	6.3	Saanen	2	10-15	0	0	0	0	1	0.0833333	0.25	0.75	0.5	2.08333
35	ISO	1	42229	42219	25	A	5	Saanen	2	10-15	1	0	1	0	7	0.333333	0	1.83333	1.25	2.33333
36	ISO	2	42239	42219	24	A	6.1	Saanen	2	10-15	0	2	0	0	2	0.166667	0	2.58333	1.66667	3.5
37	MEL	2	42239	42219	23	A	5.2	Saanen	2	10-15	1	1	0	0	5	0.0833333	0	0.25	0.166667	0.333333
38	SHAM	2	42239	42219	22	A	7	Saanen	2	10-15	0	0	0	0	0	0	0	0.25	0.0833333	0.0833333
39	ISO+MEL	2	42239	42219	25	A	7	Saanen	2	10-15	1	1	0	0	1	0	0	0	0	0
40	CAUT	2	42239	42219	22	A	5.6	Saanen	2	10-15	0	1	0	0	0	0	0	0.166667	0.0833333	0.0833333
41	CAUT	3	42251	42221	17	B	5.8	Nubian	2	10-15	0	0	0	0	0	0.25	0.0833333	1.25	0.416667	0.833333
42	SHAM	3	42251	42221	16	A	5.8	Saanen	2	10-15	1	0	1	0	2	0.0833333	0.166667	0.0833333	0	1
43	ISO	3	42251	42221	26	A	7.2	Saanen	2	10-15	3	1	1	1	2	0.166667	0.833333	0.916667	0.25	1.5
44	MEL	3	42251	42221	25	A	5.5	Saanen	2	10-15	0	0	0	0	1	0	0	0.166667	0.0833333	0.0833333
45	ISO+MEL	3	42251	42221	26	A	5.3	Saanen	2	10-15	1	0	0	0	2	0	0	0	0.166667	0.166667
46	MEL	4	42261	42221	25	A	7.2	Saanen	2	10-15	0	0	1	0	3	0	0	0.166667	0.25	0.166667
47	CAUT	4	42261	42221	25	A	8.2	Saanen	2	10-15	0	1	0	0	0	0.0833333	0	0	0.0833333	0.166667
48	ISO+MEL	4	42261	42221	25	A	5.9	Saanen	2	10-15	1	8	0	1	8	0.0833333	0	0.666667	0.5	1.08333
49	ISO	4	42261	42221	25	A	6.4	Saanen	2	10-15	0	0	0	0	1	0	0	0	0	0
50	SHAM	4	42261	42221	25	A	3.8	Saanen	2	10-15	0	0	0	0	0	0	0	0	0	0
1	ISO	1	42222	42212	19	A	6	Saanen	3	15-20	0	0	0	0	1	0.416667	3.58333	0.166667	1.58333	3
2	MEL	1	42222	42212	18	A	5	Saanen	3	15-20	1	0	0	0	8	0.166667	0.666667	0	0.166667	1.08333
3	ISO+MEL	1	42222	42212	17	A	5.3	Saanen	3	15-20	0	0	0	0	1	0.25	3.16667	0.25	0.166667	1.41667
4	SHAM	1	42222	42212	17	A	5	Saanen	3	15-20	1	0	2	0	4	0.166667	3	0.75	0.666667	0.666667
5	CAUT	1	42222	42212	17	A	4.75	Saanen	3	15-20	1	0	0	0	3	0.0833333	2	0.25	0.25	0.25
6	CAUT	2	42232	42212	18	A	5.8	Saanen	3	15-20	0	0	0	4	4	0	0	1.5	1.25	0.833333
7	SHAM	2	42232	42212	18	A	4.65	Alpine	3	15-20	0	0	0	0	1	0	0	0.416667	0.166667	0.25
9	ISO	2	42232	42212	16	A	5.6	Saanen	3	15-20	1	0	0	4	8	0	0	0.166667	0.166667	0.333333
10	ISO+MEL	2	42232	42212	18	A	5.7	Sable	3	15-20	0	0	3	0	4	0	0	1.25	0.333333	0.416667
11	SHAM	3	42242	42212	16	A	6	Saanen	3	15-20	1	0	0	1	7	0	0	0	0.166667	0.166667
12	ISO+MEL	3	42242	42212	18	A	4.5	Saanen	3	15-20	1	1	0	0	4	0	0	0.25	0	0.333333
13	CAUT	3	42242	42212	18	A	6.25	Saanen	3	15-20	0	1	0	5	5	0	0	0.5	0.333333	0.583333
14	MEL	3	42242	42212	18	A	7	Saanen	3	15-20	0	0	0	0	4	0.166667	0.416667	0.416667	0.333333	1.33333
15	ISO	3	42242	42212	16	A	4.75	Saanen	3	15-20	0	0	0	3	4	0	0.0833333	0.833333	0.25	0.333333
16	MEL	3	42246	42216	22	A	5.9	Sable	3	15-20	0	0	0	0	0	0	0	0	0	0
17	CAUT	3	42246	42216	23	A	7.8	Alpine	3	15-20	0	0	0	0	0	0	0	0	0	0
18	ISO	3	42246	42216	21	A	5.9	Saanen	3	15-20	0	0	0	0	0	0	0	0	0	0
19	ISO+MEL	3	42246	42216	20	A	6.2	Saanen	3	15-20	0	0	0	0	0	0	0	0	0	0
20	SHAM	3	42246	42216	22	A	6.2	Saanen	3	15-20	0	0	0	0	0	0	0	0	0	0
21	ISO+MEL	4	42256	42216	20	A	5.7	Saanen	3	15-20	0	0	0	0	2	0	0	0	0	0
22	ISO	4	42256	42216	19	A	6.3	Saanen	3	15-20	0	0	1	4	1	0	0	0	0	0
23	SHAM	4	42256	42216	22	A	8.5	Saanen	3	15-20	0	0	0	2	3	0	0	0	0.166667	0.0833333
24	CAUT	4	42256	42216	21	A	5.6	Saanen	3	15-20	0	0	0	0	0	0	0	0	0	0
25	MEL	4	42256	42216	19	A	5.8	Milan	3	15-20	0	0	0	0	3	0.0833333	0	0.166667	0.25	0.583333
26	ISO+MEL	5	42266	42216	19	A	4.4	Saanen	3	15-20	0	0	0	0	0	0	0	0	0	0
27	ISO	5	42266	42216	22	A	5.5	Saanen	3	15-20	1	0	0	5	6	0	0	0.0833333	0	0.166667
28	CAUT	5	42266	42216	20	A	5	Saanen	3	15-20	0	0	1	1	4	0	0	0.25	0	0
29	SHAM	5	42266	42216	21	A	6.6	Alpine	3	15-20	0	0	3	2	2	0	0	0.0833333	0	0
30	MEL	5	42266	42216	21	A	6.1	Saanen	3	15-20	2	2	2	3	0	0	0.166667	0.416667	0.333333	0.333333
31	SHAM	1	42229	42219	23	B	3.6	Saanen	3	15-20	2	3	0	1	3	0.166667	0.0833333	0.666667	0.75	3.25
32	ISO+MEL	1	42229	42219	23	A	5.9	Saanen	3	15-20	0	0	1	7	3	0.25	0.166667	2.41667	2.5	3.41667
33	MEL	1	42229	42219	24	A	5.5	Saanen	3	15-20	0	0	0	1	1	0.333333	0.333333	1.33333	1.5	1.75
34	CAUT	1	42229	42219	23	A	6.3	Saanen	3	15-20	0	0	0	0	4	0.0833333	0.25	0.75	0.5	2.08333
35	ISO	1	42229	42219	25	A	5	Saanen	3	15-20	0	0	0	0	2	0.333333	0	1.83333	1.25	2.33333
36	ISO	2	42239	42219	24	A	6.1	Saanen	3	15-20	0	0	1	3	3	0.166667	0	2.58333	1.66667	3.5
37	MEL	2	42239	42219	23	A	5.2	Saanen	3	15-20	0	0	0	0	0	0.0833333	0	0.25	0.166667	0.333333
38	SHAM	2	42239	42219	22	A	7	Saanen	3	15-20	0	0	2	0	2	0	0	0.25	0.0833333	0.0833333
39	ISO+MEL	2	42239	42219	25	A	7	Saanen	3	15-20	0	2	2	0	6	0	0	0	0	0
40	CAUT	2	42239	42219	22	A	5.6	Saanen	3	15-20	0	0	2	1	5	0	0	0.166667	0.0833333	0.0833333
41	CAUT	3	42251	42221	17	B	5.8	Nubian	3	15-20	0	1	0	0	1	0.25	0.0833333	1.25	0.416667	0.833333
42	SHAM	3	42251	42221	16	A	5.8	Saanen	3	15-20	1	1	1	0	2	0.0833333	0.166667	0.0833333	0	1
43	ISO	3	42251	42221	26	A	7.2	Saanen	3	15-20	0	0	1	0	1	0.166667	0.833333	0.916667	0.25	1.5
44	MEL	3	42251	42221	25	A	5.5	Saanen	3	15-20	1	0	1	1	3	0	0	0.166667	0.0833333	0.0833333
45	ISO+MEL	3	42251	42221	26	A	5.3	Saanen	3	15-20	0	0	3	0	1	0	0	0	0.166667	0.166667
46	MEL	4	42261	42221	25	A	7.2	Saanen	3	15-20	1	3	0	2	3	0	0	0.166667	0.25	0.166667
47	CAUT	4	42261	42221	25	A	8.2	Saanen	3	15-20	0	1	0	1	6	0.0833333	0	0	0.0833333	0.166667
48	ISO+MEL	4	42261	42221	25	A	5.9	Saanen	3	15-20	0	1	0	0	3	0.0833333	0	0.666667	0.5	1.08333
49	ISO	4	42261	42221	25	A	6.4	Saanen	3	15-20	0	2	0	0	0	0	0	0	0	0
50	SHAM	4	42261	42221	25	A	3.8	Saanen	3	15-20	1	0	0	0	1	0	0	0	0	0
1	ISO	1	42222	42212	19	A	6	Saanen	4	20-25	1	0	0	0	5	0.416667	3.58333	0.166667	1.58333	3
2	MEL	1	42222	42212	18	A	5	Saanen	4	20-25	0	0	0	1	3	0.166667	0.666667	0	0.166667	1.08333
3	ISO+MEL	1	42222	42212	17	A	5.3	Saanen	4	20-25	1	0	1	0	2	0.25	3.16667	0.25	0.166667	1.41667
4	SHAM	1	42222	42212	17	A	5	Saanen	4	20-25	0	0	1	0	0	0.166667	3	0.75	0.666667	0.666667
5	CAUT	1	42222	42212	17	A	4.75	Saanen	4	20-25	0	0	0	0	0	0.0833333	2	0.25	0.25	0.25
6	CAUT	2	42232	42212	18	A	5.8	Saanen	4	20-25	0	1	1	2	5	0	0	1.5	1.25	0.833333
7	SHAM	2	42232	42212	18	A	4.65	Alpine	4	20-25	0	0	1	0	2	0	0	0.416667	0.166667	0.25
9	ISO	2	42232	42212	16	A	5.6	Saanen	4	20-25	0	0	0	0	0	0	0	0.166667	0.166667	0.333333
10	ISO+MEL	2	42232	42212	18	A	5.7	Sable	4	20-25	1	0	2	1	1	0	0	1.25	0.333333	0.416667
11	SHAM	3	42242	42212	16	A	6	Saanen	4	20-25	1	6	0	1	2	0	0	0	0.166667	0.166667
12	ISO+MEL	3	42242	42212	18	A	4.5	Saanen	4	20-25	1	1	1	0	2	0	0	0.25	0	0.333333
13	CAUT	3	42242	42212	18	A	6.25	Saanen	4	20-25	0	0	2	2	4	0	0	0.5	0.333333	0.583333
14	MEL	3	42242	42212	18	A	7	Saanen	4	20-25	0	0	0	0	1	0.166667	0.416667	0.416667	0.333333	1.33333
15	ISO	3	42242	42212	16	A	4.75	Saanen	4	20-25	0	0	2	2	1	0	0.0833333	0.833333	0.25	0.333333
16	MEL	3	42246	42216	22	A	5.9	Sable	4	20-25	0	0	0	0	0	0	0	0	0	0
17	CAUT	3	42246	42216	23	A	7.8	Alpine	4	20-25	0	0	0	0	0	0	0	0	0	0
18	ISO	3	42246	42216	21	A	5.9	Saanen	4	20-25	0	0	0	0	0	0	0	0	0	0
19	ISO+MEL	3	42246	42216	20	A	6.2	Saanen	4	20-25	0	0	0	0	0	0	0	0	0	0
20	SHAM	3	42246	42216	22	A	6.2	Saanen	4	20-25	0	0	0	0	0	0	0	0	0	0
21	ISO+MEL	4	42256	42216	20	A	5.7	Saanen	4	20-25	1	0	0	0	2	0	0	0	0	0
22	ISO	4	42256	42216	19	A	6.3	Saanen	4	20-25	0	0	2	1	2	0	0	0	0	0
23	SHAM	4	42256	42216	22	A	8.5	Saanen	4	20-25	0	5	0	0	7	0	0	0	0.166667	0.0833333
24	CAUT	4	42256	42216	21	A	5.6	Saanen	4	20-25	0	0	0	0	0	0	0	0	0	0
25	MEL	4	42256	42216	19	A	5.8	Milan	4	20-25	0	0	1	3	2	0.0833333	0	0.166667	0.25	0.583333
26	ISO+MEL	5	42266	42216	19	A	4.4	Saanen	4	20-25	3	0	0	0	3	0	0	0	0	0
27	ISO	5	42266	42216	22	A	5.5	Saanen	4	20-25	0	0	2	7	1	0	0	0.0833333	0	0.166667
28	CAUT	5	42266	42216	20	A	5	Saanen	4	20-25	0	0	2	0	0	0	0	0.25	0	0
29	SHAM	5	42266	42216	21	A	6.6	Alpine	4	20-25	1	0	4	1	4	0	0	0.0833333	0	0
30	MEL	5	42266	42216	21	A	6.1	Saanen	4	20-25	0	0	2	0	1	0	0.166667	0.416667	0.333333	0.333333
31	SHAM	1	42229	42219	23	B	3.6	Saanen	4	20-25	0	0	2	0	4	0.166667	0.0833333	0.666667	0.75	3.25
32	ISO+MEL	1	42229	42219	23	A	5.9	Saanen	4	20-25	1	2	1	3	5	0.25	0.166667	2.41667	2.5	3.41667
33	MEL	1	42229	42219	24	A	5.5	Saanen	4	20-25	1	0	3	1	4	0.333333	0.333333	1.33333	1.5	1.75
34	CAUT	1	42229	42219	23	A	6.3	Saanen	4	20-25	0	0	0	0	1	0.0833333	0.25	0.75	0.5	2.08333
35	ISO	1	42229	42219	25	A	5	Saanen	4	20-25	0	0	0	0	1	0.333333	0	1.83333	1.25	2.33333
36	ISO	2	42239	42219	24	A	6.1	Saanen	4	20-25	1	1	2	1	2	0.166667	0	2.58333	1.66667	3.5
37	MEL	2	42239	42219	23	A	5.2	Saanen	4	20-25	0	0	1	0	3	0.0833333	0	0.25	0.166667	0.333333
38	SHAM	2	42239	42219	22	A	7	Saanen	4	20-25	0	0	1	0	1	0	0	0.25	0.0833333	0.0833333
39	ISO+MEL	2	42239	42219	25	A	7	Saanen	4	20-25	0	0	0	3	4	0	0	0	0	0
40	CAUT	2	42239	42219	22	A	5.6	Saanen	4	20-25	1	0	0	4	3	0	0	0.166667	0.0833333	0.0833333
41	CAUT	3	42251	42221	17	B	5.8	Nubian	4	20-25	1	0	0	2	3	0.25	0.0833333	1.25	0.416667	0.833333
42	SHAM	3	42251	42221	16	A	5.8	Saanen	4	20-25	0	0	3	2	4	0.0833333	0.166667	0.0833333	0	1
43	ISO	3	42251	42221	26	A	7.2	Saanen	4	20-25	0	0	0	0	0	0.166667	0.833333	0.916667	0.25	1.5
44	MEL	3	42251	42221	25	A	5.5	Saanen	4	20-25	0	0	1	0	6	0	0	0.166667	0.0833333	0.0833333
45	ISO+MEL	3	42251	42221	26	A	5.3	Saanen	4	20-25	0	0	1	0	0	0	0	0	0.166667	0.166667
46	MEL	4	42261	42221	25	A	7.2	Saanen	4	20-25	0	9	0	1	4	0	0	0.166667	0.25	0.166667
47	CAUT	4	42261	42221	25	A	8.2	Saanen	4	20-25	0	7	0	0	0	0.0833333	0	0	0.0833333	0.166667
48	ISO+MEL	4	42261	42221	25	A	5.9	Saanen	4	20-25	0	0	1	1	2	0.0833333	0	0.666667	0.5	1.08333
49	ISO	4	42261	42221	25	A	6.4	Saanen	4	20-25	1	5	0	0	1	0	0	0	0	0
50	SHAM	4	42261	42221	25	A	3.8	Saanen	4	20-25	1	0	0	0	1	0	0	0	0	0
1	ISO	1	42222	42212	19	A	6	Saanen	5	25-30	1	0	1	2	5	0.416667	3.58333	0.166667	1.58333	3
2	MEL	1	42222	42212	18	A	5	Saanen	5	25-30	0	0	1	0	2	0.166667	0.666667	0	0.166667	1.08333
3	ISO+MEL	1	42222	42212	17	A	5.3	Saanen	5	25-30	0	0	0	0	0	0.25	3.16667	0.25	0.166667	1.41667
4	SHAM	1	42222	42212	17	A	5	Saanen	5	25-30	0	0	1	4	5	0.166667	3	0.75	0.666667	0.666667
5	CAUT	1	42222	42212	17	A	4.75	Saanen	5	25-30	0	0	0	0	0	0.0833333	2	0.25	0.25	0.25
6	CAUT	2	42232	42212	18	A	5.8	Saanen	5	25-30	0	0	0	3	0	0	0	1.5	1.25	0.833333
7	SHAM	2	42232	42212	18	A	4.65	Alpine	5	25-30	0	0	1	1	0	0	0	0.416667	0.166667	0.25
9	ISO	2	42232	42212	16	A	5.6	Saanen	5	25-30	0	0	0	0	0	0	0	0.166667	0.166667	0.333333
10	ISO+MEL	2	42232	42212	18	A	5.7	Sable	5	25-30	0	0	3	2	3	0	0	1.25	0.333333	0.416667
11	SHAM	3	42242	42212	16	A	6	Saanen	5	25-30	0	5	0	0	0	0	0	0	0.166667	0.166667
12	ISO+MEL	3	42242	42212	18	A	4.5	Saanen	5	25-30	0	0	0	0	0	0	0	0.25	0	0.333333
13	CAUT	3	42242	42212	18	A	6.25	Saanen	5	25-30	0	0	1	3	1	0	0	0.5	0.333333	0.583333
14	MEL	3	42242	42212	18	A	7	Saanen	5	25-30	0	3	0	2	2	0.166667	0.416667	0.416667	0.333333	1.33333
15	ISO	3	42242	42212	16	A	4.75	Saanen	5	25-30	0	0	0	1	4	0	0.0833333	0.833333	0.25	0.333333
16	MEL	3	42246	42216	22	A	5.9	Sable	5	25-30	0	0	0	0	0	0	0	0	0	0
17	CAUT	3	42246	42216	23	A	7.8	Alpine	5	25-30	0	0	0	0	0	0	0	0	0	0
18	ISO	3	42246	42216	21	A	5.9	Saanen	5	25-30	0	0	0	0	0	0	0	0	0	0
19	ISO+MEL	3	42246	42216	20	A	6.2	Saanen	5	25-30	0	0	0	0	0	0	0	0	0	0
20	SHAM	3	42246	42216	22	A	6.2	Saanen	5	25-30	0	0	0	0	0	0	0	0	0	0
21	ISO+MEL	4	42256	42216	20	A	5.7	Saanen	5	25-30	0	0	1	2	2	0	0	0	0	0
22	ISO	4	42256	42216	19	A	6.3	Saanen	5	25-30	0	0	0	3	10	0	0	0	0	0
23	SHAM	4	42256	42216	22	A	8.5	Saanen	5	25-30	1	0	1	0	4	0	0	0	0.166667	0.0833333
24	CAUT	4	42256	42216	21	A	5.6	Saanen	5	25-30	0	0	0	0	1	0	0	0	0	0
25	MEL	4	42256	42216	19	A	5.8	Milan	5	25-30	0	0	0	2	3	0.0833333	0	0.166667	0.25	0.583333
26	ISO+MEL	5	42266	42216	19	A	4.4	Saanen	5	25-30	0	2	0	0	1	0	0	0	0	0
27	ISO	5	42266	42216	22	A	5.5	Saanen	5	25-30	0	0	5	1	6	0	0	0.0833333	0	0.166667
28	CAUT	5	42266	42216	20	A	5	Saanen	5	25-30	0	0	4	3	1	0	0	0.25	0	0
29	SHAM	5	42266	42216	21	A	6.6	Alpine	5	25-30	0	0	0	1	4	0	0	0.0833333	0	0
30	MEL	5	42266	42216	21	A	6.1	Saanen	5	25-30	0	0	3	1	1	0	0.166667	0.416667	0.333333	0.333333
31	SHAM	1	42229	42219	23	B	3.6	Saanen	5	25-30	1	0	2	1	4	0.166667	0.0833333	0.666667	0.75	3.25
32	ISO+MEL	1	42229	42219	23	A	5.9	Saanen	5	25-30	0	0	1	4	4	0.25	0.166667	2.41667	2.5	3.41667
33	MEL	1	42229	42219	24	A	5.5	Saanen	5	25-30	0	0	1	1	3	0.333333	0.333333	1.33333	1.5	1.75
34	CAUT	1	42229	42219	23	A	6.3	Saanen	5	25-30	1	0	2	0	3	0.0833333	0.25	0.75	0.5	2.08333
35	ISO	1	42229	42219	25	A	5	Saanen	5	25-30	0	0	0	1	0	0.333333	0	1.83333	1.25	2.33333
36	ISO	2	42239	42219	24	A	6.1	Saanen	5	25-30	0	0	2	1	3	0.166667	0	2.58333	1.66667	3.5
37	MEL	2	42239	42219	23	A	5.2	Saanen	5	25-30	0	0	2	0	1	0.0833333	0	0.25	0.166667	0.333333
38	SHAM	2	42239	42219	22	A	7	Saanen	5	25-30	0	2	2	1	0	0	0	0.25	0.0833333	0.0833333
39	ISO+MEL	2	42239	42219	25	A	7	Saanen	5	25-30	1	0	1	0	1	0	0	0	0	0
40	CAUT	2	42239	42219	22	A	5.6	Saanen	5	25-30	0	1	0	0	0	0	0	0.166667	0.0833333	0.0833333
41	CAUT	3	42251	42221	17	B	5.8	Nubian	5	25-30	0	0	0	5	6	0.25	0.0833333	1.25	0.416667	0.833333
42	SHAM	3	42251	42221	16	A	5.8	Saanen	5	25-30	0	0	2	1	2	0.0833333	0.166667	0.0833333	0	1
43	ISO	3	42251	42221	26	A	7.2	Saanen	5	25-30	0	1	0	0	2	0.166667	0.833333	0.916667	0.25	1.5
44	MEL	3	42251	42221	25	A	5.5	Saanen	5	25-30	0	0	0	0	3	0	0	0.166667	0.0833333	0.0833333
45	ISO+MEL	3	42251	42221	26	A	5.3	Saanen	5	25-30	0	0	1	0	2	0	0	0	0.166667	0.166667
46	MEL	4	42261	42221	25	A	7.2	Saanen	5	25-30	0	3	1	0	1	0	0	0.166667	0.25	0.166667
47	CAUT	4	42261	42221	25	A	8.2	Saanen	5	25-30	0	6	1	1	3	0.0833333	0	0	0.0833333	0.166667
48	ISO+MEL	4	42261	42221	25	A	5.9	Saanen	5	25-30	0	2	1	4	2	0.0833333	0	0.666667	0.5	1.08333
49	ISO	4	42261	42221	25	A	6.4	Saanen	5	25-30	0	0	2	0	0	0	0	0	0	0
50	SHAM	4	42261	42221	25	A	3.8	Saanen	5	25-30	0	0	0	0	1	0	0	0	0	0
1	ISO	1	42222	42212	19	A	6	Saanen	6	30-35	0	0	0	0	3	0.416667	3.58333	0.166667	1.58333	3
2	MEL	1	42222	42212	18	A	5	Saanen	6	30-35	0	0	1	4	2	0.166667	0.666667	0	0.166667	1.08333
3	ISO+MEL	1	42222	42212	17	A	5.3	Saanen	6	30-35	0	0	0	0	1	0.25	3.16667	0.25	0.166667	1.41667
4	SHAM	1	42222	42212	17	A	5	Saanen	6	30-35	0	0	1	4	4	0.166667	3	0.75	0.666667	0.666667
5	CAUT	1	42222	42212	17	A	4.75	Saanen	6	30-35	0	0	0	0	0	0.0833333	2	0.25	0.25	0.25
6	CAUT	2	42232	42212	18	A	5.8	Saanen	6	30-35	0	1	1	1	2	0	0	1.5	1.25	0.833333
7	SHAM	2	42232	42212	18	A	4.65	Alpine	6	30-35	0	0	2	1	0	0	0	0.416667	0.166667	0.25
9	ISO	2	42232	42212	16	A	5.6	Saanen	6	30-35	0	0	0	0	0	0	0	0.166667	0.166667	0.333333
10	ISO+MEL	2	42232	42212	18	A	5.7	Sable	6	30-35	0	0	2	5	3	0	0	1.25	0.333333	0.416667
11	SHAM	3	42242	42212	16	A	6	Saanen	6	30-35	1	0	1	0	7	0	0	0	0.166667	0.166667
12	ISO+MEL	3	42242	42212	18	A	4.5	Saanen	6	30-35	0	0	0	0	0	0	0	0.25	0	0.333333
13	CAUT	3	42242	42212	18	A	6.25	Saanen	6	30-35	0	0	2	3	3	0	0	0.5	0.333333	0.583333
14	MEL	3	42242	42212	18	A	7	Saanen	6	30-35	1	5	0	1	3	0.166667	0.416667	0.416667	0.333333	1.33333
15	ISO	3	42242	42212	16	A	4.75	Saanen	6	30-35	0	0	0	7	7	0	0.0833333	0.833333	0.25	0.333333
16	MEL	3	42246	42216	22	A	5.9	Sable	6	30-35	0	0	0	0	0	0	0	0	0	0
17	CAUT	3	42246	42216	23	A	7.8	Alpine	6	30-35	0	0	0	0	0	0	0	0	0	0
18	ISO	3	42246	42216	21	A	5.9	Saanen	6	30-35	0	0	0	0	0	0	0	0	0	0
19	ISO+MEL	3	42246	42216	20	A	6.2	Saanen	6	30-35	0	0	0	0	0	0	0	0	0	0
20	SHAM	3	42246	42216	22	A	6.2	Saanen	6	30-35	0	0	0	0	0	0	0	0	0	0
21	ISO+MEL	4	42256	42216	20	A	5.7	Saanen	6	30-35	0	0	3	1	0	0	0	0	0	0
22	ISO	4	42256	42216	19	A	6.3	Saanen	6	30-35	1	0	1	1	3	0	0	0	0	0
23	SHAM	4	42256	42216	22	A	8.5	Saanen	6	30-35	0	0	3	0	2	0	0	0	0.166667	0.0833333
24	CAUT	4	42256	42216	21	A	5.6	Saanen	6	30-35	0	0	0	0	0	0	0	0	0	0
25	MEL	4	42256	42216	19	A	5.8	Milan	6	30-35	0	0	3	4	1	0.0833333	0	0.166667	0.25	0.583333
26	ISO+MEL	5	42266	42216	19	A	4.4	Saanen	6	30-35	2	1	0	0	1	0	0	0	0	0
27	ISO	5	42266	42216	22	A	5.5	Saanen	6	30-35	0	0	1	4	3	0	0	0.0833333	0	0.166667
28	CAUT	5	42266	42216	20	A	5	Saanen	6	30-35	0	0	3	4	7	0	0	0.25	0	0
29	SHAM	5	42266	42216	21	A	6.6	Alpine	6	30-35	0	0	1	3	2	0	0	0.0833333	0	0
30	MEL	5	42266	42216	21	A	6.1	Saanen	6	30-35	0	0	3	3	0	0	0.166667	0.416667	0.333333	0.333333
31	SHAM	1	42229	42219	23	B	3.6	Saanen	6	30-35	0	0	1	4	5	0.166667	0.0833333	0.666667	0.75	3.25
32	ISO+MEL	1	42229	42219	23	A	5.9	Saanen	6	30-35	1	0	2	3	8	0.25	0.166667	2.41667	2.5	3.41667
33	MEL	1	42229	42219	24	A	5.5	Saanen	6	30-35	1	0	0	2	2	0.333333	0.333333	1.33333	1.5	1.75
34	CAUT	1	42229	42219	23	A	6.3	Saanen	6	30-35	0	0	2	7	11	0.0833333	0.25	0.75	0.5	2.08333
35	ISO	1	42229	42219	25	A	5	Saanen	6	30-35	1	0	1	5	2	0.333333	0	1.83333	1.25	2.33333
36	ISO	2	42239	42219	24	A	6.1	Saanen	6	30-35	0	0	0	2	1	0.166667	0	2.58333	1.66667	3.5
37	MEL	2	42239	42219	23	A	5.2	Saanen	6	30-35	0	1	0	0	1	0.0833333	0	0.25	0.166667	0.333333
38	SHAM	2	42239	42219	22	A	7	Saanen	6	30-35	0	1	0	1	1	0	0	0.25	0.0833333	0.0833333
39	ISO+MEL	2	42239	42219	25	A	7	Saanen	6	30-35	0	2	0	0	0	0	0	0	0	0
40	CAUT	2	42239	42219	22	A	5.6	Saanen	6	30-35	0	0	0	1	1	0	0	0.166667	0.0833333	0.0833333
41	CAUT	3	42251	42221	17	B	5.8	Nubian	6	30-35	1	0	2	1	2	0.25	0.0833333	1.25	0.416667	0.833333
42	SHAM	3	42251	42221	16	A	5.8	Saanen	6	30-35	1	0	0	1	0	0.0833333	0.166667	0.0833333	0	1
43	ISO	3	42251	42221	26	A	7.2	Saanen	6	30-35	0	0	0	0	1	0.166667	0.833333	0.916667	0.25	1.5
44	MEL	3	42251	42221	25	A	5.5	Saanen	6	30-35	0	0	0	0	1	0	0	0.166667	0.0833333	0.0833333
45	ISO+MEL	3	42251	42221	26	A	5.3	Saanen	6	30-35	0	3	1	2	3	0	0	0	0.166667	0.166667
46	MEL	4	42261	42221	25	A	7.2	Saanen	6	30-35	0	11	1	0	2	0	0	0.166667	0.25	0.166667
47	CAUT	4	42261	42221	25	A	8.2	Saanen	6	30-35	0	3	0	3	3	0.0833333	0	0	0.0833333	0.166667
48	ISO+MEL	4	42261	42221	25	A	5.9	Saanen	6	30-35	0	0	1	6	1	0.0833333	0	0.666667	0.5	1.08333
49	ISO	4	42261	42221	25	A	6.4	Saanen	6	30-35	0	0	3	1	2	0	0	0	0	0
50	SHAM	4	42261	42221	25	A	3.8	Saanen	6	30-35	1	0	0	0	2	0	0	0	0	0
1	ISO	1	42222	42212	19	A	6	Saanen	7	35-40	0	0	0	0	2	0.416667	3.58333	0.166667	1.58333	3
2	MEL	1	42222	42212	18	A	5	Saanen	7	35-40	0	0	0	2	3	0.166667	0.666667	0	0.166667	1.08333
3	ISO+MEL	1	42222	42212	17	A	5.3	Saanen	7	35-40	0	0	0	0	0	0.25	3.16667	0.25	0.166667	1.41667
4	SHAM	1	42222	42212	17	A	5	Saanen	7	35-40	0	0	0	0	0	0.166667	3	0.75	0.666667	0.666667
5	CAUT	1	42222	42212	17	A	4.75	Saanen	7	35-40	0	0	0	0	2	0.0833333	2	0.25	0.25	0.25
6	CAUT	2	42232	42212	18	A	5.8	Saanen	7	35-40	0	0	0	1	4	0	0	1.5	1.25	0.833333
7	SHAM	2	42232	42212	18	A	4.65	Alpine	7	35-40	0	0	0	0	0	0	0	0.416667	0.166667	0.25
9	ISO	2	42232	42212	16	A	5.6	Saanen	7	35-40	0	0	2	0	2	0	0	0.166667	0.166667	0.333333
10	ISO+MEL	2	42232	42212	18	A	5.7	Sable	7	35-40	0	0	3	2	3	0	0	1.25	0.333333	0.416667
11	SHAM	3	42242	42212	16	A	6	Saanen	7	35-40	0	0	0	0	1	0	0	0	0.166667	0.166667
12	ISO+MEL	3	42242	42212	18	A	4.5	Saanen	7	35-40	0	0	0	0	1	0	0	0.25	0	0.333333
13	CAUT	3	42242	42212	18	A	6.25	Saanen	7	35-40	0	3	1	1	2	0	0	0.5	0.333333	0.583333
14	MEL	3	42242	42212	18	A	7	Saanen	7	35-40	1	2	0	0	4	0.166667	0.416667	0.416667	0.333333	1.33333
15	ISO	3	42242	42212	16	A	4.75	Saanen	7	35-40	0	0	0	7	8	0	0.0833333	0.833333	0.25	0.333333
16	MEL	3	42246	42216	22	A	5.9	Sable	7	35-40	0	0	0	0	0	0	0	0	0	0
17	CAUT	3	42246	42216	23	A	7.8	Alpine	7	35-40	0	0	0	0	0	0	0	0	0	0
18	ISO	3	42246	42216	21	A	5.9	Saanen	7	35-40	0	0	0	0	0	0	0	0	0	0
19	ISO+MEL	3	42246	42216	20	A	6.2	Saanen	7	35-40	0	0	0	0	0	0	0	0	0	0
20	SHAM	3	42246	42216	22	A	6.2	Saanen	7	35-40	0	0	0	0	0	0	0	0	0	0
21	ISO+MEL	4	42256	42216	20	A	5.7	Saanen	7	35-40	0	1	0	0	0	0	0	0	0	0
22	ISO	4	42256	42216	19	A	6.3	Saanen	7	35-40	0	0	3	5	3	0	0	0	0	0
23	SHAM	4	42256	42216	22	A	8.5	Saanen	7	35-40	0	0	1	2	0	0	0	0	0.166667	0.0833333
24	CAUT	4	42256	42216	21	A	5.6	Saanen	7	35-40	0	0	0	0	1	0	0	0	0	0
25	MEL	4	42256	42216	19	A	5.8	Milan	7	35-40	1	0	0	6	2	0.0833333	0	0.166667	0.25	0.583333
26	ISO+MEL	5	42266	42216	19	A	4.4	Saanen	7	35-40	2	0	0	1	4	0	0	0	0	0
27	ISO	5	42266	42216	22	A	5.5	Saanen	7	35-40	0	0	0	3	2	0	0	0.0833333	0	0.166667
28	CAUT	5	42266	42216	20	A	5	Saanen	7	35-40	0	0	1	4	11	0	0	0.25	0	0
29	SHAM	5	42266	42216	21	A	6.6	Alpine	7	35-40	0	0	0	1	0	0	0	0.0833333	0	0
30	MEL	5	42266	42216	21	A	6.1	Saanen	7	35-40	0	0	2	2	0	0	0.166667	0.416667	0.333333	0.333333
31	SHAM	1	42229	42219	23	B	3.6	Saanen	7	35-40	1	0	3	1	3	0.166667	0.0833333	0.666667	0.75	3.25
32	ISO+MEL	1	42229	42219	23	A	5.9	Saanen	7	35-40	0	0	4	7	3	0.25	0.166667	2.41667	2.5	3.41667
33	MEL	1	42229	42219	24	A	5.5	Saanen	7	35-40	0	0	3	4	1	0.333333	0.333333	1.33333	1.5	1.75
34	CAUT	1	42229	42219	23	A	6.3	Saanen	7	35-40	0	0	0	4	6	0.0833333	0.25	0.75	0.5	2.08333
35	ISO	1	42229	42219	25	A	5	Saanen	7	35-40	0	0	0	3	0	0.333333	0	1.83333	1.25	2.33333
36	ISO	2	42239	42219	24	A	6.1	Saanen	7	35-40	0	4	0	0	3	0.166667	0	2.58333	1.66667	3.5
37	MEL	2	42239	42219	23	A	5.2	Saanen	7	35-40	0	0	1	4	5	0.0833333	0	0.25	0.166667	0.333333
38	SHAM	2	42239	42219	22	A	7	Saanen	7	35-40	0	0	1	0	0	0	0	0.25	0.0833333	0.0833333
39	ISO+MEL	2	42239	42219	25	A	7	Saanen	7	35-40	0	1	2	0	4	0	0	0	0	0
40	CAUT	2	42239	42219	22	A	5.6	Saanen	7	35-40	0	0	2	3	1	0	0	0.166667	0.0833333	0.0833333
41	CAUT	3	42251	42221	17	B	5.8	Nubian	7	35-40	0	0	4	4	9	0.25	0.0833333	1.25	0.416667	0.833333
42	SHAM	3	42251	42221	16	A	5.8	Saanen	7	35-40	0	0	0	1	3	0.0833333	0.166667	0.0833333	0	1
43	ISO	3	42251	42221	26	A	7.2	Saanen	7	35-40	0	1	0	1	1	0.166667	0.833333	0.916667	0.25	1.5
44	MEL	3	42251	42221	25	A	5.5	Saanen	7	35-40	0	0	0	0	1	0	0	0.166667	0.0833333	0.0833333
45	ISO+MEL	3	42251	42221	26	A	5.3	Saanen	7	35-40	0	3	0	0	1	0	0	0	0.166667	0.166667
46	MEL	4	42261	42221	25	A	7.2	Saanen	7	35-40	1	4	0	1	7	0	0	0.166667	0.25	0.166667
47	CAUT	4	42261	42221	25	A	8.2	Saanen	7	35-40	0	3	1	2	0	0.0833333	0	0	0.0833333	0.166667
48	ISO+MEL	4	42261	42221	25	A	5.9	Saanen	7	35-40	0	1	0	5	1	0.0833333	0	0.666667	0.5	1.08333
49	ISO	4	42261	42221	25	A	6.4	Saanen	7	35-40	0	0	1	2	3	0	0	0	0	0
50	SHAM	4	42261	42221	25	A	3.8	Saanen	7	35-40	0	0	0	0	0	0	0	0	0	0
1	ISO	1	42222	42212	19	A	6	Saanen	8	40-45	0	0	0	2	5	0.416667	3.58333	0.166667	1.58333	3
2	MEL	1	42222	42212	18	A	5	Saanen	8	40-45	0	0	0	3	2	0.166667	0.666667	0	0.166667	1.08333
3	ISO+MEL	1	42222	42212	17	A	5.3	Saanen	8	40-45	0	0	0	0	0	0.25	3.16667	0.25	0.166667	1.41667
4	SHAM	1	42222	42212	17	A	5	Saanen	8	40-45	0	0	0	2	2	0.166667	3	0.75	0.666667	0.666667
5	CAUT	1	42222	42212	17	A	4.75	Saanen	8	40-45	0	0	2	0	2	0.0833333	2	0.25	0.25	0.25
6	CAUT	2	42232	42212	18	A	5.8	Saanen	8	40-45	0	0	3	3	2	0	0	1.5	1.25	0.833333
7	SHAM	2	42232	42212	18	A	4.65	Alpine	8	40-45	0	0	0	0	0	0	0	0.416667	0.166667	0.25
9	ISO	2	42232	42212	16	A	5.6	Saanen	8	40-45	0	0	0	1	1	0	0	0.166667	0.166667	0.333333
10	ISO+MEL	2	42232	42212	18	A	5.7	Sable	8	40-45	0	0	5	1	2	0	0	1.25	0.333333	0.416667
11	SHAM	3	42242	42212	16	A	6	Saanen	8	40-45	0	0	0	2	2	0	0	0	0.166667	0.166667
12	ISO+MEL	3	42242	42212	18	A	4.5	Saanen	8	40-45	0	0	0	0	0	0	0	0.25	0	0.333333
13	CAUT	3	42242	42212	18	A	6.25	Saanen	8	40-45	1	2	2	0	2	0	0	0.5	0.333333	0.583333
14	MEL	3	42242	42212	18	A	7	Saanen	8	40-45	0	0	3	3	4	0.166667	0.416667	0.416667	0.333333	1.33333
15	ISO	3	42242	42212	16	A	4.75	Saanen	8	40-45	0	0	0	0	1	0	0.0833333	0.833333	0.25	0.333333
16	MEL	3	42246	42216	22	A	5.9	Sable	8	40-45	0	0	0	0	0	0	0	0	0	0
17	CAUT	3	42246	42216	23	A	7.8	Alpine	8	40-45	0	0	0	0	0	0	0	0	0	0
18	ISO	3	42246	42216	21	A	5.9	Saanen	8	40-45	0	0	0	0	0	0	0	0	0	0
19	ISO+MEL	3	42246	42216	20	A	6.2	Saanen	8	40-45	0	0	0	0	0	0	0	0	0	0
20	SHAM	3	42246	42216	22	A	6.2	Saanen	8	40-45	0	0	0	0	0	0	0	0	0	0
21	ISO+MEL	4	42256	42216	20	A	5.7	Saanen	8	40-45	0	0	1	2	3	0	0	0	0	0
22	ISO	4	42256	42216	19	A	6.3	Saanen	8	40-45	0	0	3	2	1	0	0	0	0	0
23	SHAM	4	42256	42216	22	A	8.5	Saanen	8	40-45	1	0	2	2	5	0	0	0	0.166667	0.0833333
24	CAUT	4	42256	42216	21	A	5.6	Saanen	8	40-45	0	0	3	0	1	0	0	0	0	0
25	MEL	4	42256	42216	19	A	5.8	Milan	8	40-45	0	0	0	2	2	0.0833333	0	0.166667	0.25	0.583333
26	ISO+MEL	5	42266	42216	19	A	4.4	Saanen	8	40-45	1	0	2	4	1	0	0	0	0	0
27	ISO	5	42266	42216	22	A	5.5	Saanen	8	40-45	0	0	2	5	3	0	0	0.0833333	0	0.166667
28	CAUT	5	42266	42216	20	A	5	Saanen	8	40-45	0	0	0	5	5	0	0	0.25	0	0
29	SHAM	5	42266	42216	21	A	6.6	Alpine	8	40-45	0	0	1	1	0	0	0	0.0833333	0	0
30	MEL	5	42266	42216	21	A	6.1	Saanen	8	40-45	0	0	3	1	0	0	0.166667	0.416667	0.333333	0.333333
31	SHAM	1	42229	42219	23	B	3.6	Saanen	8	40-45	0	0	0	0	1	0.166667	0.0833333	0.666667	0.75	3.25
32	ISO+MEL	1	42229	42219	23	A	5.9	Saanen	8	40-45	0	0	0	1	2	0.25	0.166667	2.41667	2.5	3.41667
33	MEL	1	42229	42219	24	A	5.5	Saanen	8	40-45	0	0	3	1	5	0.333333	0.333333	1.33333	1.5	1.75
34	CAUT	1	42229	42219	23	A	6.3	Saanen	8	40-45	0	0	0	0	3	0.0833333	0.25	0.75	0.5	2.08333
35	ISO	1	42229	42219	25	A	5	Saanen	8	40-45	0	0	1	2	2	0.333333	0	1.83333	1.25	2.33333
36	ISO	2	42239	42219	24	A	6.1	Saanen	8	40-45	0	1	0	0	1	0.166667	0	2.58333	1.66667	3.5
37	MEL	2	42239	42219	23	A	5.2	Saanen	8	40-45	0	1	0	2	1	0.0833333	0	0.25	0.166667	0.333333
38	SHAM	2	42239	42219	22	A	7	Saanen	8	40-45	0	0	1	0	0	0	0	0.25	0.0833333	0.0833333
39	ISO+MEL	2	42239	42219	25	A	7	Saanen	8	40-45	0	0	0	0	1	0	0	0	0	0
40	CAUT	2	42239	42219	22	A	5.6	Saanen	8	40-45	0	0	2	1	0	0	0	0.166667	0.0833333	0.0833333
41	CAUT	3	42251	42221	17	B	5.8	Nubian	8	40-45	0	0	6	3	3	0.25	0.0833333	1.25	0.416667	0.833333
42	SHAM	3	42251	42221	16	A	5.8	Saanen	8	40-45	0	0	0	1	0	0.0833333	0.166667	0.0833333	0	1
43	ISO	3	42251	42221	26	A	7.2	Saanen	8	40-45	0	0	0	3	2	0.166667	0.833333	0.916667	0.25	1.5
44	MEL	3	42251	42221	25	A	5.5	Saanen	8	40-45	0	0	1	0	2	0	0	0.166667	0.0833333	0.0833333
45	ISO+MEL	3	42251	42221	26	A	5.3	Saanen	8	40-45	0	2	0	0	0	0	0	0	0.166667	0.166667
46	MEL	4	42261	42221	25	A	7.2	Saanen	8	40-45	0	5	0	0	3	0	0	0.166667	0.25	0.166667
47	CAUT	4	42261	42221	25	A	8.2	Saanen	8	40-45	0	4	1	1	3	0.0833333	0	0	0.0833333	0.166667
48	ISO+MEL	4	42261	42221	25	A	5.9	Saanen	8	40-45	0	1	1	5	5	0.0833333	0	0.666667	0.5	1.08333
49	ISO	4	42261	42221	25	A	6.4	Saanen	8	40-45	0	0	1	1	0	0	0	0	0	0
50	SHAM	4	42261	42221	25	A	3.8	Saanen	8	40-45	0	0	0	0	0	0	0	0	0	0
1	ISO	1	42222	42212	19	A	6	Saanen	9	45-50	0	0	0	0	0	0.416667	3.58333	0.166667	1.58333	3
2	MEL	1	42222	42212	18	A	5	Saanen	9	45-50	0	0	0	3	1	0.166667	0.666667	0	0.166667	1.08333
3	ISO+MEL	1	42222	42212	17	A	5.3	Saanen	9	45-50	1	0	2	3	3	0.25	3.16667	0.25	0.166667	1.41667
4	SHAM	1	42222	42212	17	A	5	Saanen	9	45-50	0	0	0	2	3	0.166667	3	0.75	0.666667	0.666667
5	CAUT	1	42222	42212	17	A	4.75	Saanen	9	45-50	0	0	1	1	5	0.0833333	2	0.25	0.25	0.25
6	CAUT	2	42232	42212	18	A	5.8	Saanen	9	45-50	0	0	1	1	0	0	0	1.5	1.25	0.833333
7	SHAM	2	42232	42212	18	A	4.65	Alpine	9	45-50	0	0	0	0	0	0	0	0.416667	0.166667	0.25
9	ISO	2	42232	42212	16	A	5.6	Saanen	9	45-50	0	0	0	2	0	0	0	0.166667	0.166667	0.333333
10	ISO+MEL	2	42232	42212	18	A	5.7	Sable	9	45-50	0	0	1	3	0	0	0	1.25	0.333333	0.416667
11	SHAM	3	42242	42212	16	A	6	Saanen	9	45-50	0	0	2	3	6	0	0	0	0.166667	0.166667
12	ISO+MEL	3	42242	42212	18	A	4.5	Saanen	9	45-50	0	0	0	0	1	0	0	0.25	0	0.333333
13	CAUT	3	42242	42212	18	A	6.25	Saanen	9	45-50	0	1	2	4	3	0	0	0.5	0.333333	0.583333
14	MEL	3	42242	42212	18	A	7	Saanen	9	45-50	0	0	1	4	7	0.166667	0.416667	0.416667	0.333333	1.33333
15	ISO	3	42242	42212	16	A	4.75	Saanen	9	45-50	0	0	0	8	7	0	0.0833333	0.833333	0.25	0.333333
16	MEL	3	42246	42216	22	A	5.9	Sable	9	45-50	0	0	0	0	0	0	0	0	0	0
17	CAUT	3	42246	42216	23	A	7.8	Alpine	9	45-50	0	0	0	0	0	0	0	0	0	0
18	ISO	3	42246	42216	21	A	5.9	Saanen	9	45-50	0	0	0	0	0	0	0	0	0	0
19	ISO+MEL	3	42246	42216	20	A	6.2	Saanen	9	45-50	0	0	0	0	0	0	0	0	0	0
20	SHAM	3	42246	42216	22	A	6.2	Saanen	9	45-50	0	0	0	0	0	0	0	0	0	0
21	ISO+MEL	4	42256	42216	20	A	5.7	Saanen	9	45-50	0	0	3	2	0	0	0	0	0	0
22	ISO	4	42256	42216	19	A	6.3	Saanen	9	45-50	0	0	1	0	0	0	0	0	0	0
23	SHAM	4	42256	42216	22	A	8.5	Saanen	9	45-50	0	0	2	3	0	0	0	0	0.166667	0.0833333
24	CAUT	4	42256	42216	21	A	5.6	Saanen	9	45-50	0	0	0	0	0	0	0	0	0	0
25	MEL	4	42256	42216	19	A	5.8	Milan	9	45-50	0	0	0	0	3	0.0833333	0	0.166667	0.25	0.583333
26	ISO+MEL	5	42266	42216	19	A	4.4	Saanen	9	45-50	0	0	5	1	2	0	0	0	0	0
27	ISO	5	42266	42216	22	A	5.5	Saanen	9	45-50	0	0	5	3	1	0	0	0.0833333	0	0.166667
28	CAUT	5	42266	42216	20	A	5	Saanen	9	45-50	0	0	5	2	0	0	0	0.25	0	0
29	SHAM	5	42266	42216	21	A	6.6	Alpine	9	45-50	0	0	0	1	3	0	0	0.0833333	0	0
30	MEL	5	42266	42216	21	A	6.1	Saanen	9	45-50	0	0	4	2	3	0	0.166667	0.416667	0.333333	0.333333
31	SHAM	1	42229	42219	23	B	3.6	Saanen	9	45-50	0	0	1	1	5	0.166667	0.0833333	0.666667	0.75	3.25
32	ISO+MEL	1	42229	42219	23	A	5.9	Saanen	9	45-50	0	0	0	1	2	0.25	0.166667	2.41667	2.5	3.41667
33	MEL	1	42229	42219	24	A	5.5	Saanen	9	45-50	0	0	2	4	4	0.333333	0.333333	1.33333	1.5	1.75
34	CAUT	1	42229	42219	23	A	6.3	Saanen	9	45-50	0	0	0	0	1	0.0833333	0.25	0.75	0.5	2.08333
35	ISO	1	42229	42219	25	A	5	Saanen	9	45-50	0	0	0	1	3	0.333333	0	1.83333	1.25	2.33333
36	ISO	2	42239	42219	24	A	6.1	Saanen	9	45-50	0	0	2	0	1	0.166667	0	2.58333	1.66667	3.5
37	MEL	2	42239	42219	23	A	5.2	Saanen	9	45-50	0	0	1	1	0	0.0833333	0	0.25	0.166667	0.333333
38	SHAM	2	42239	42219	22	A	7	Saanen	9	45-50	0	1	1	0	0	0	0	0.25	0.0833333	0.0833333
39	ISO+MEL	2	42239	42219	25	A	7	Saanen	9	45-50	0	0	0	0	0	0	0	0	0	0
40	CAUT	2	42239	42219	22	A	5.6	Saanen	9	45-50	0	0	2	0	0	0	0	0.166667	0.0833333	0.0833333
41	CAUT	3	42251	42221	17	B	5.8	Nubian	9	45-50	0	0	1	1	7	0.25	0.0833333	1.25	0.416667	0.833333
42	SHAM	3	42251	42221	16	A	5.8	Saanen	9	45-50	0	0	6	1	4	0.0833333	0.166667	0.0833333	0	1
43	ISO	3	42251	42221	26	A	7.2	Saanen	9	45-50	0	0	0	0	0	0.166667	0.833333	0.916667	0.25	1.5
44	MEL	3	42251	42221	25	A	5.5	Saanen	9	45-50	0	0	0	0	0	0	0	0.166667	0.0833333	0.0833333
45	ISO+MEL	3	42251	42221	26	A	5.3	Saanen	9	45-50	1	0	0	0	2	0	0	0	0.166667	0.166667
46	MEL	4	42261	42221	25	A	7.2	Saanen	9	45-50	0	2	0	3	3	0	0	0.166667	0.25	0.166667
47	CAUT	4	42261	42221	25	A	8.2	Saanen	9	45-50	0	1	0	0	0	0.0833333	0	0	0.0833333	0.166667
48	ISO+MEL	4	42261	42221	25	A	5.9	Saanen	9	45-50	0	0	1	1	1	0.0833333	0	0.666667	0.5	1.08333
49	ISO	4	42261	42221	25	A	6.4	Saanen	9	45-50	0	0	3	2	1	0	0	0	0	0
50	SHAM	4	42261	42221	25	A	3.8	Saanen	9	45-50	1	0	0	0	1	0	0	0	0	0
1	ISO	1	42222	42212	19	A	6	Saanen	10	50-55	0	0	0	0	0	0.416667	3.58333	0.166667	1.58333	3
2	MEL	1	42222	42212	18	A	5	Saanen	10	50-55	0	0	0	0	1	0.166667	0.666667	0	0.166667	1.08333
3	ISO+MEL	1	42222	42212	17	A	5.3	Saanen	10	50-55	0	0	0	1	1	0.25	3.16667	0.25	0.166667	1.41667
4	SHAM	1	42222	42212	17	A	5	Saanen	10	50-55	0	0	0	0	5	0.166667	3	0.75	0.666667	0.666667
5	CAUT	1	42222	42212	17	A	4.75	Saanen	10	50-55	0	0	2	0	5	0.0833333	2	0.25	0.25	0.25
6	CAUT	2	42232	42212	18	A	5.8	Saanen	10	50-55	0	0	2	1	2	0	0	1.5	1.25	0.833333
7	SHAM	2	42232	42212	18	A	4.65	Alpine	10	50-55	0	0	0	0	0	0	0	0.416667	0.166667	0.25
9	ISO	2	42232	42212	16	A	5.6	Saanen	10	50-55	0	0	1	0	0	0	0	0.166667	0.166667	0.333333
10	ISO+MEL	2	42232	42212	18	A	5.7	Sable	10	50-55	0	0	2	0	0	0	0	1.25	0.333333	0.416667
11	SHAM	3	42242	42212	16	A	6	Saanen	10	50-55	1	1	1	0	2	0	0	0	0.166667	0.166667
12	ISO+MEL	3	42242	42212	18	A	4.5	Saanen	10	50-55	0	0	0	0	0	0	0	0.25	0	0.333333
13	CAUT	3	42242	42212	18	A	6.25	Saanen	10	50-55	0	0	1	0	0	0	0	0.5	0.333333	0.583333
14	MEL	3	42242	42212	18	A	7	Saanen	10	50-55	0	0	0	0	0	0.166667	0.416667	0.416667	0.333333	1.33333
15	ISO	3	42242	42212	16	A	4.75	Saanen	10	50-55	0	0	1	7	5	0	0.0833333	0.833333	0.25	0.333333
16	MEL	3	42246	42216	22	A	5.9	Sable	10	50-55	0	0	0	0	0	0	0	0	0	0
17	CAUT	3	42246	42216	23	A	7.8	Alpine	10	50-55	0	0	0	0	0	0	0	0	0	0
18	ISO	3	42246	42216	21	A	5.9	Saanen	10	50-55	0	0	0	0	0	0	0	0	0	0
19	ISO+MEL	3	42246	42216	20	A	6.2	Saanen	10	50-55	0	0	0	0	0	0	0	0	0	0
20	SHAM	3	42246	42216	22	A	6.2	Saanen	10	50-55	0	0	0	0	0	0	0	0	0	0
21	ISO+MEL	4	42256	42216	20	A	5.7	Saanen	10	50-55	0	0	3	1	0	0	0	0	0	0
22	ISO	4	42256	42216	19	A	6.3	Saanen	10	50-55	0	0	1	1	2	0	0	0	0	0
23	SHAM	4	42256	42216	22	A	8.5	Saanen	10	50-55	0	0	0	0	0	0	0	0	0.166667	0.0833333
24	CAUT	4	42256	42216	21	A	5.6	Saanen	10	50-55	0	0	0	0	0	0	0	0	0	0
25	MEL	4	42256	42216	19	A	5.8	Milan	10	50-55	0	0	0	1	1	0.0833333	0	0.166667	0.25	0.583333
26	ISO+MEL	5	42266	42216	19	A	4.4	Saanen	10	50-55	0	0	1	2	1	0	0	0	0	0
27	ISO	5	42266	42216	22	A	5.5	Saanen	10	50-55	0	0	1	2	1	0	0	0.0833333	0	0.166667
28	CAUT	5	42266	42216	20	A	5	Saanen	10	50-55	0	0	0	1	0	0	0	0.25	0	0
29	SHAM	5	42266	42216	21	A	6.6	Alpine	10	50-55	0	0	0	2	3	0	0	0.0833333	0	0
30	MEL	5	42266	42216	21	A	6.1	Saanen	10	50-55	0	0	2	1	2	0	0.166667	0.416667	0.333333	0.333333
31	SHAM	1	42229	42219	23	B	3.6	Saanen	10	50-55	0	0	0	0	0	0.166667	0.0833333	0.666667	0.75	3.25
32	ISO+MEL	1	42229	42219	23	A	5.9	Saanen	10	50-55	0	0	1	3	5	0.25	0.166667	2.41667	2.5	3.41667
33	MEL	1	42229	42219	24	A	5.5	Saanen	10	50-55	0	0	1	4	1	0.333333	0.333333	1.33333	1.5	1.75
34	CAUT	1	42229	42219	23	A	6.3	Saanen	10	50-55	0	0	0	0	4	0.0833333	0.25	0.75	0.5	2.08333
35	ISO	1	42229	42219	25	A	5	Saanen	10	50-55	0	0	0	2	2	0.333333	0	1.83333	1.25	2.33333
36	ISO	2	42239	42219	24	A	6.1	Saanen	10	50-55	0	0	0	0	1	0.166667	0	2.58333	1.66667	3.5
37	MEL	2	42239	42219	23	A	5.2	Saanen	10	50-55	0	0	2	0	1	0.0833333	0	0.25	0.166667	0.333333
38	SHAM	2	42239	42219	22	A	7	Saanen	10	50-55	0	0	1	0	2	0	0	0.25	0.0833333	0.0833333
39	ISO+MEL	2	42239	42219	25	A	7	Saanen	10	50-55	0	0	1	1	0	0	0	0	0	0
40	CAUT	2	42239	42219	22	A	5.6	Saanen	10	50-55	0	0	1	2	3	0	0	0.166667	0.0833333	0.0833333
41	CAUT	3	42251	42221	17	B	5.8	Nubian	10	50-55	0	0	0	1	1	0.25	0.0833333	1.25	0.416667	0.833333
42	SHAM	3	42251	42221	16	A	5.8	Saanen	10	50-55	0	0	5	2	0	0.0833333	0.166667	0.0833333	0	1
43	ISO	3	42251	42221	26	A	7.2	Saanen	10	50-55	0	0	0	0	0	0.166667	0.833333	0.916667	0.25	1.5
44	MEL	3	42251	42221	25	A	5.5	Saanen	10	50-55	0	0	0	0	0	0	0	0.166667	0.0833333	0.0833333
45	ISO+MEL	3	42251	42221	26	A	5.3	Saanen	10	50-55	0	0	0	0	4	0	0	0	0.166667	0.166667
46	MEL	4	42261	42221	25	A	7.2	Saanen	10	50-55	0	0	1	1	0	0	0	0.166667	0.25	0.166667
47	CAUT	4	42261	42221	25	A	8.2	Saanen	10	50-55	0	0	2	4	6	0.0833333	0	0	0.0833333	0.166667
48	ISO+MEL	4	42261	42221	25	A	5.9	Saanen	10	50-55	0	2	4	1	2	0.0833333	0	0.666667	0.5	1.08333
49	ISO	4	42261	42221	25	A	6.4	Saanen	10	50-55	0	0	2	1	0	0	0	0	0	0
50	SHAM	4	42261	42221	25	A	3.8	Saanen	10	50-55	0	0	0	0	0	0	0	0	0	0
1	ISO	1	42222	42212	19	A	6	Saanen	11	55-60	0	0	0	1	1	0.416667	3.58333	0.166667	1.58333	3
2	MEL	1	42222	42212	18	A	5	Saanen	11	55-60	0	0	0	2	1	0.166667	0.666667	0	0.166667	1.08333
3	ISO+MEL	1	42222	42212	17	A	5.3	Saanen	11	55-60	0	0	0	0	0	0.25	3.16667	0.25	0.166667	1.41667
4	SHAM	1	42222	42212	17	A	5	Saanen	11	55-60	0	0	0	0	0	0.166667	3	0.75	0.666667	0.666667
5	CAUT	1	42222	42212	17	A	4.75	Saanen	11	55-60	0	0	1	1	1	0.0833333	2	0.25	0.25	0.25
6	CAUT	2	42232	42212	18	A	5.8	Saanen	11	55-60	0	0	0	0	0	0	0	1.5	1.25	0.833333
7	SHAM	2	42232	42212	18	A	4.65	Alpine	11	55-60	0	0	0	0	0	0	0	0.416667	0.166667	0.25
9	ISO	2	42232	42212	16	A	5.6	Saanen	11	55-60	1	0	0	0	2	0	0	0.166667	0.166667	0.333333
10	ISO+MEL	2	42232	42212	18	A	5.7	Sable	11	55-60	0	0	1	3	2	0	0	1.25	0.333333	0.416667
11	SHAM	3	42242	42212	16	A	6	Saanen	11	55-60	0	0	0	0	0	0	0	0	0.166667	0.166667
12	ISO+MEL	3	42242	42212	18	A	4.5	Saanen	11	55-60	0	0	1	0	1	0	0	0.25	0	0.333333
13	CAUT	3	42242	42212	18	A	6.25	Saanen	11	55-60	0	0	0	0	0	0	0	0.5	0.333333	0.583333
14	MEL	3	42242	42212	18	A	7	Saanen	11	55-60	0	0	0	0	0	0.166667	0.416667	0.416667	0.333333	1.33333
15	ISO	3	42242	42212	16	A	4.75	Saanen	11	55-60	0	0	0	0	0	0	0.0833333	0.833333	0.25	0.333333
16	MEL	3	42246	42216	22	A	5.9	Sable	11	55-60	0	0	0	0	0	0	0	0	0	0
17	CAUT	3	42246	42216	23	A	7.8	Alpine	11	55-60	0	0	0	0	0	0	0	0	0	0
18	ISO	3	42246	42216	21	A	5.9	Saanen	11	55-60	0	0	0	0	0	0	0	0	0	0
19	ISO+MEL	3	42246	42216	20	A	6.2	Saanen	11	55-60	0	0	0	0	0	0	0	0	0	0
20	SHAM	3	42246	42216	22	A	6.2	Saanen	11	55-60	0	0	0	0	0	0	0	0	0	0
21	ISO+MEL	4	42256	42216	20	A	5.7	Saanen	11	55-60	1	0	1	2	2	0	0	0	0	0
22	ISO	4	42256	42216	19	A	6.3	Saanen	11	55-60	0	0	0	5	7	0	0	0	0	0
23	SHAM	4	42256	42216	22	A	8.5	Saanen	11	55-60	0	0	1	0	2	0	0	0	0.166667	0.0833333
24	CAUT	4	42256	42216	21	A	5.6	Saanen	11	55-60	1	0	0	0	2	0	0	0	0	0
25	MEL	4	42256	42216	19	A	5.8	Milan	11	55-60	0	1	0	0	0	0.0833333	0	0.166667	0.25	0.583333
26	ISO+MEL	5	42266	42216	19	A	4.4	Saanen	11	55-60	1	0	2	2	2	0	0	0	0	0
27	ISO	5	42266	42216	22	A	5.5	Saanen	11	55-60	1	0	4	4	7	0	0	0.0833333	0	0.166667
28	CAUT	5	42266	42216	20	A	5	Saanen	11	55-60	0	0	1	3	1	0	0	0.25	0	0
29	SHAM	5	42266	42216	21	A	6.6	Alpine	11	55-60	0	0	0	0	0	0	0	0.0833333	0	0
30	MEL	5	42266	42216	21	A	6.1	Saanen	11	55-60	0	0	4	3	0	0	0.166667	0.416667	0.333333	0.333333
31	SHAM	1	42229	42219	23	B	3.6	Saanen	11	55-60	0	0	0	0	2	0.166667	0.0833333	0.666667	0.75	3.25
32	ISO+MEL	1	42229	42219	23	A	5.9	Saanen	11	55-60	1	0	1	0	3	0.25	0.166667	2.41667	2.5	3.41667
33	MEL	1	42229	42219	24	A	5.5	Saanen	11	55-60	1	0	0	2	2	0.333333	0.333333	1.33333	1.5	1.75
34	CAUT	1	42229	42219	23	A	6.3	Saanen	11	55-60	0	0	1	0	2	0.0833333	0.25	0.75	0.5	2.08333
35	ISO	1	42229	42219	25	A	5	Saanen	11	55-60	0	0	0	0	2	0.333333	0	1.83333	1.25	2.33333
36	ISO	2	42239	42219	24	A	6.1	Saanen	11	55-60	1	0	3	0	3	0.166667	0	2.58333	1.66667	3.5
37	MEL	2	42239	42219	23	A	5.2	Saanen	11	55-60	0	0	3	0	0	0.0833333	0	0.25	0.166667	0.333333
38	SHAM	2	42239	42219	22	A	7	Saanen	11	55-60	0	0	0	0	0	0	0	0.25	0.0833333	0.0833333
39	ISO+MEL	2	42239	42219	25	A	7	Saanen	11	55-60	0	0	0	0	2	0	0	0	0	0
40	CAUT	2	42239	42219	22	A	5.6	Saanen	11	55-60	1	0	2	1	3	0	0	0.166667	0.0833333	0.0833333
41	CAUT	3	42251	42221	17	B	5.8	Nubian	11	55-60	0	0	1	0	3	0.25	0.0833333	1.25	0.416667	0.833333
42	SHAM	3	42251	42221	16	A	5.8	Saanen	11	55-60	0	0	2	0	0	0.0833333	0.166667	0.0833333	0	1
43	ISO	3	42251	42221	26	A	7.2	Saanen	11	55-60	1	0	1	3	10	0.166667	0.833333	0.916667	0.25	1.5
44	MEL	3	42251	42221	25	A	5.5	Saanen	11	55-60	0	0	1	1	1	0	0	0.166667	0.0833333	0.0833333
45	ISO+MEL	3	42251	42221	26	A	5.3	Saanen	11	55-60	1	0	0	0	1	0	0	0	0.166667	0.166667
46	MEL	4	42261	42221	25	A	7.2	Saanen	11	55-60	0	2	0	0	3	0	0	0.166667	0.25	0.166667
47	CAUT	4	42261	42221	25	A	8.2	Saanen	11	55-60	1	0	0	3	6	0.0833333	0	0	0.0833333	0.166667
48	ISO+MEL	4	42261	42221	25	A	5.9	Saanen	11	55-60	0	0	0	6	2	0.0833333	0	0.666667	0.5	1.08333
49	ISO	4	42261	42221	25	A	6.4	Saanen	11	55-60	0	0	0	1	2	0	0	0	0	0
50	SHAM	4	42261	42221	25	A	3.8	Saanen	11	55-60	0	0	0	0	1	0	0	0	0	0

## Sheet: Behaviour 1 h total
KidID!	Trt!	Pen!	Rep!	Trt_Date!	Age_at_trt!	Farm!	Weight	Breed!	BodyShake	Feed	Groom	HeadScratch	HeadShake
1	ISO	1	42212-1	42212	19	A	6	Saanen	-2	-40	-1	-13	-7
2	MEL	1	42212-1	42212	18	A	5	Saanen	2	3	3	14	34
3	ISO+MEL	1	42212-1	42212	17	A	5.3	Saanen	0	-35	2	2	4
4	SHAM	1	42212-1	42212	17	A	5	Saanen	-1	-34	-3	9	28
5	CAUT	1	42212-1	42212	17	A	4.75	Saanen	2	-23	4	-1	23
6	CAUT	2	42212-2	42212	18	A	5.8	Saanen	1	4	-10	6	19
7	SHAM	2	42212-2	42212	18	A	4.65	Alpine	1	0	0	0	8
9	ISO	2	42212-2	42212	16	A	5.6	Saanen	2	5	2	6	16
10	ISO+MEL	2	42212-2	42212	18	A	5.7	Sable	1	5	7	13	19
11	SHAM	3	42212-3	42212	16	A	6	Saanen	5	22	4	5	33
12	ISO+MEL	3	42212-3	42212	18	A	4.5	Saanen	5	23	-1	1	23
13	CAUT	3	42212-3	42212	18	A	6.25	Saanen	7	18	5	17	26
14	MEL	3	42212-3	42212	18	A	7	Saanen	1	16	-1	6	15
15	ISO	3	42212-3	42212	16	A	4.75	Saanen	0	-1	-6	32	36
16	MEL	3	42216-3	42216	22	A	5.9	Sable
17	CAUT	3	42216-3	42216	23	A	7.8	Alpine
18	ISO	3	42216-3	42216	21	A	5.9	Saanen
19	ISO+MEL	3	42216-3	42216	20	A	6.2	Saanen
20	SHAM	3	42216-3	42216	22	A	6.2	Saanen
21	ISO+MEL	4	42216-4	42216	20	A	5.7	Saanen	4	5	12	10	22
22	ISO	4	42216-4	42216	19	A	6.3	Saanen	2	1	12	26	35
23	SHAM	4	42216-4	42216	22	A	8.5	Saanen	3	5	12	8	26
24	CAUT	4	42216-4	42216	21	A	5.6	Saanen	3	0	3	3	11
25	MEL	4	42216-4	42216	19	A	5.8	Milan	1	3	2	15	15
26	ISO+MEL	5	42216-5	42216	19	A	4.4	Saanen	9	4	10	7	15
27	ISO	5	42216-5	42216	22	A	5.5	Saanen	3	7	20	38	35
28	CAUT	5	42216-5	42216	20	A	5	Saanen	1	6	14	25	40
29	SHAM	5	42216-5	42216	21	A	6.6	Alpine	1	0	8	12	30
30	MEL	5	42216-5	42216	21	A	6.1	Saanen	3	14	20	12	10
31	SHAM	1	42219-1	42219	23	B	3.6	Saanen	6	5	1	-1	-2
32	ISO+MEL	1	42219-1	42219	23	A	5.9	Saanen	1	4	-16	3	1
33	MEL	1	42219-1	42219	24	A	5.5	Saanen	1	-4	-1	-1	12
34	CAUT	1	42219-1	42219	23	A	6.3	Saanen	1	-3	-6	4	17
35	ISO	1	42219-1	42219	25	A	5	Saanen	0	-1	-21	-7	-15
36	ISO	2	42219-2	42219	24	A	6.1	Saanen	1	8	-19	-8	-9
37	MEL	2	42219-2	42219	23	A	5.2	Saanen	0	5	7	5	16
38	SHAM	2	42219-2	42219	22	A	7	Saanen	1	5	6	1	15
39	ISO+MEL	2	42219-2	42219	25	A	7	Saanen	2	7	6	4	21
40	CAUT	2	42219-2	42219	22	A	5.6	Saanen	2	3	9	14	24
41	CAUT	3	42221-3	42221	17	B	5.8	Nubian	-1	0	2	12	27
42	SHAM	3	42221-3	42221	16	A	5.8	Saanen	3	-1	19	10	13
43	ISO	3	42221-3	42221	26	A	7.2	Saanen	3	-3	-7	5	8
44	MEL	3	42221-3	42221	25	A	5.5	Saanen	2	2	2	2	30
45	ISO+MEL	3	42221-3	42221	26	A	5.3	Saanen	4	8	6	0	15
46	MEL	4	42221-4	42221	25	A	7.2	Saanen	4	39	4	5	34
47	CAUT	4	42221-4	42221	25	A	8.2	Saanen	1	31	5	15	33
48	ISO+MEL	4	42221-4	42221	25	A	5.9	Saanen	0	31	1	24	21
49	ISO	4	42221-4	42221	25	A	6.4	Saanen	1	9	13	9	14
50	SHAM	4	42221-4	42221	25	A	3.8	Saanen	5	4	0	0	11
